# Supplementary material for: Metabolomic analysis of honey bee ( Apis mellifera L.) response to glyphosate exposure
Source: Royal Society of Chemistry journal article supplement (doi:10.1039/d2mo00046f), 2022-05-03
Supplement: d2mo00046f3.xlsx [file d2mo00046f3.xlsx]

## Sheet: REU_Analysis_Cardiometabolic.co
marker	Mean_Estimate_Deceased	Mean_Estimate_Intubated	Mean_Estimate_NonSevere	lgFCH_Deceased_vs_Intubated	FCH_Deceased_vs_Intubated	p_Deceased_vs_Intubated	lgFCH_Deceased_vs_NonSevere	FCH_Deceased_vs_NonSevere	p_Deceased_vs_NonSevere	lgFCH_Intubated_vs_NonSevere	FCH_Intubated_vs_NonSevere	p_Intubated_vs_NonSevere	FDR_Deceased_vs_Intubated	FDR_Deceased_vs_NonSevere	FDR_Intubated_vs_NonSevere
QDPR	3.52177	3.73528	3.22209	-0.213505	-1.1595	0.212636	0.299682	1.23087	0.0433138	0.513186	1.4272	3.90111e-05	0.359457	0.0665645	0.000271548
QPCT	3.56473	3.26204	3.07768	0.302689	1.23344	0.0331628	0.487046	1.40157	8.44824e-05	0.184357	1.13631	0.0708888	0.0919749	0.000218914	0.130956
RARRES2	2.65269	2.57679	2.55724	0.0758947	1.05401	0.522418	0.0954505	1.0684	0.351973	0.0195558	1.01365	0.818655	0.657654	0.417895	0.862382
RNASE3	2.78848	2.25531	1.66644	0.533161	1.4471	0.0414492	1.12203	2.17653	1.03048e-06	0.588871	1.50407	0.0018238	0.107405	4.40748e-06	0.00719389
RNASET2	4.74321	4.60686	4.35321	0.136349	1.09912	0.168222	0.390004	1.3104	7.02226e-06	0.253655	1.19222	0.000409757	0.315972	2.42029e-05	0.00204879
ROR1	0.863105	0.496358	0.553217	0.366747	1.28944	0.0002454	0.309888	1.23961	0.000332998	-0.0568586	-1.0402	0.424222	0.00229256	0.000757784	0.517522
S100A11	1.83123	1.82778	1.28917	0.00345036	1.00239	0.975083	0.542064	1.45605	3.09383e-08	0.538614	1.45258	6.08373e-11	0.989176	1.71611e-07	5.39931e-09
SCARF1	3.50324	3.28619	3.13436	0.217043	1.16235	0.119822	0.368875	1.29135	0.00234493	0.151832	1.11098	0.130157	0.244465	0.00459917	0.205359
RCOR1	0.619869	0.661334	0.499268	-0.0414653	-1.02916	0.542464	0.120601	1.08719	0.0409493	0.162066	1.11889	0.00102983	0.671524	0.0634803	0.00451345
REG1A	6.3595	5.30251	5.08272	1.05699	2.08059	1.22575e-05	1.27678	2.42298	1.67751e-09	0.21979	1.16456	0.199439	0.000395583	1.45248e-08	0.291361
REG1B	4.69353	3.6125	3.30566	1.08103	2.11555	4.86473e-05	1.38787	2.61692	2.82268e-09	0.306837	1.23699	0.104788	0.000908937	2.27739e-08	0.176247
REG3A	5.08282	4.01857	3.805	1.06425	2.09108	4.3974e-05	1.27782	2.42473	2.04651e-08	0.213576	1.15956	0.248119	0.000867265	1.23137e-07	0.34311
REN	2.80414	2.18938	1.85208	0.614759	1.5313	0.00257605	0.952058	1.93463	1.05422e-07	0.337299	1.26339	0.0210423	0.0127014	5.50364e-07	0.0508164
RETN	7.18005	6.79127	6.15087	0.388781	1.30929	0.027438	1.02918	2.04087	5.95166e-11	0.640403	1.55876	6.73948e-07	0.0799204	8.80349e-10	9.96882e-06
SEMA3F	2.1942	1.82244	1.64449	0.371764	1.29393	0.000754036	0.549708	1.46379	1.45515e-08	0.177944	1.13127	0.0241674	0.00480497	9.06278e-08	0.0568174
SEMA7A	4.74117	4.61183	4.39056	0.12934	1.09379	0.249942	0.350609	1.2751	0.000349444	0.221269	1.16576	0.00646133	0.398713	0.000785143	0.0201208
SERPINA11	6.58723	6.74841	6.49866	-0.161186	-1.11821	0.195873	0.0885719	1.06332	0.41032	0.249758	1.18901	0.00554973	0.344663	0.478444	0.0177492
SERPINB5	0.368614	0.153142	0.181781	0.215472	1.16108	0.00323526	0.186833	1.13826	0.00312655	-0.0286393	-1.02005	0.583645	0.0145382	0.00581112	0.669494
SERPINE1	6.68292	6.86246	6.24887	-0.179538	-1.13252	0.401144	0.434047	1.35102	0.0192776	0.613585	1.53006	8.09885e-05	0.541589	0.0321293	0.000513409
SFTPD	3.76239	3.46967	3.10955	0.292727	1.22495	0.197429	0.652844	1.57226	0.000960777	0.360117	1.28353	0.0278523	0.345258	0.00196021	0.0633818
SDC1	4.03041	3.95304	3.21972	0.077377	1.0551	0.713395	0.810697	1.75406	1.16487e-05	0.73332	1.66246	2.02104e-06	0.812018	3.79383e-05	2.31442e-05
SDC4	2.90043	3.09589	2.91244	-0.195462	-1.14509	0.241318	-0.0120133	-1.00836	0.933495	0.183449	1.1356	0.12648	0.389399	0.950222	0.200448
SELE	5.67832	5.86182	5.6477	-0.183497	-1.13563	0.186254	0.0306259	1.02146	0.798184	0.214123	1.16	0.0323609	0.33394	0.841199	0.071167
SELP	2.94825	2.87215	2.75898	0.0761031	1.05417	0.620827	0.189275	1.14019	0.155037	0.113172	1.0816	0.306605	0.748172	0.199413	0.404119
SLITRK6	2.37445	2.33189	2.29162	0.0425584	1.02994	0.659195	0.0828294	1.05909	0.320772	0.0402711	1.02831	0.561707	0.777456	0.386014	0.660284
SNAP23	3.90013	3.52083	3.92068	0.379299	1.30071	0.260065	-0.0205541	-1.01435	0.943624	-0.399853	-1.31937	0.0991137	0.410325	0.951666	0.167549
SNX9	2.88258	2.67356	2.48683	0.209019	1.1559	0.315649	0.395743	1.31562	0.0283713	0.186724	1.13818	0.212736	0.464961	0.0451651	0.304982
SOD1	1.9354	1.97949	1.50876	-0.0440949	-1.03104	0.820028	0.426637	1.3441	0.0112619	0.470732	1.38581	0.000818244	0.88531	0.0191291	0.00367692
SORT1	4.45525	4.37859	4.18035	0.0766673	1.05458	0.476474	0.274902	1.20991	0.003334	0.198235	1.14729	0.0108484	0.617329	0.00612057	0.0300873
SOST	5.1869	4.97885	4.68926	0.208046	1.15512	0.0981367	0.497636	1.4119	6.41075e-06	0.289589	1.22229	0.00146207	0.215053	2.23119e-05	0.00610627
SPARCL1	3.79088	3.38939	3.27748	0.401487	1.32087	5.48899e-05	0.513399	1.42741	4.1184e-09	0.111912	1.08066	0.113707	0.000928652	3.0459e-08	0.186019
SPON2	5.14496	4.80253	4.24982	0.342437	1.2679	0.0379817	0.895137	1.85979	1.01411e-09	0.552701	1.46683	4.37038e-06	0.101326	9.47397e-09	4.1932e-05
SPP1	9.28128	8.61421	8.06116	0.667064	1.58784	0.000433604	1.22012	2.32966	5.79227e-13	0.553053	1.46719	5.26022e-05	0.00334629	2.28473e-11	0.000345811
SSC4D	1.90266	1.98726	2.4676	-0.084607	-1.0604	0.746969	-0.564942	-1.47933	0.0130974	-0.480335	-1.39507	0.0112756	0.831267	0.022036	0.0303905
SSC5D	2.97663	3.12131	3.099	-0.144677	-1.10548	0.169676	-0.122368	-1.08852	0.178787	0.0223089	1.01558	0.76805	0.317025	0.225869	0.823739
ST6GAL1	6.13674	6.10806	5.62356	0.0286876	1.02008	0.810177	0.513184	1.4272	1.0824e-06	0.484496	1.3991	3.77739e-08	0.882248	4.57442e-06	7.44986e-07
STK11	2.44309	2.36829	1.91431	0.0748063	1.05322	0.657064	0.528785	1.44271	0.000325269	0.453979	1.36981	0.000211304	0.777456	0.000744971	0.00117208
STK4	0.362671	0.360642	0.387123	0.00202964	1.00141	0.985572	-0.024452	-1.01709	0.800916	-0.0264817	-1.01853	0.74283	0.991156	0.841199	0.812657
SUSD1	1.05575	1.05654	1.06248	-0.00078344	-1.00054	0.98922	-0.00672517	-1.00467	0.89321	-0.00594173	-1.00413	0.886683	0.992015	0.919101	0.912961
TCL1B	0.0200548	0.0250328	0.166257	-0.00497807	-1.00346	0.958246	-0.146202	-1.10665	0.0758791	-0.141224	-1.10284	0.0395594	0.986022	0.108181	0.0821263
TCN2	8.1821	8.11711	7.8731	0.0649848	1.04607	0.527671	0.308999	1.23885	0.000575231	0.244015	1.18428	0.0010756	0.659589	0.00123762	0.00465655
TFF3	2.50674	1.79349	1.45855	0.713258	1.6395	0.00244843	1.04819	2.06793	3.73182e-07	0.33493	1.26132	0.0469071	0.0127014	1.76639e-06	0.0931597
TFPI	4.68014	4.69167	4.48948	-0.0115335	-1.00803	0.903023	0.190656	1.14128	0.020289	0.202189	1.15044	0.00318608	0.945644	0.0336569	0.0114248
TFRC	2.31268	2.20778	2.04502	0.1049	1.07542	0.332548	0.267656	1.20385	0.00444357	0.162756	1.11942	0.0370755	0.481855	0.00804831	0.0788132
TGFBI	4.76976	4.92634	4.79429	-0.156581	-1.11464	0.0738149	-0.0245294	-1.01715	0.74518	0.132052	1.09585	0.0361974	0.172397	0.801633	0.07741
TGFBR3	3.98234	3.62239	3.51057	0.359952	1.28338	0.00415164	0.471768	1.38681	1.62533e-05	0.111816	1.08059	0.213058	0.017757	5.01733e-05	0.304982
TGM2	4.78451	4.85705	4.38655	-0.0725421	-1.05157	0.756061	0.397953	1.31764	0.0492485	0.470495	1.38558	0.00536363	0.836142	0.0740815	0.0173099
THBD	3.43774	3.07304	2.84977	0.364691	1.28761	0.00175358	0.587965	1.50313	1.01843e-08	0.223274	1.16738	0.00758237	0.00929137	6.82157e-08	0.0228775
THBS4	3.64642	3.21483	3.05977	0.43159	1.34872	0.0133349	0.586643	1.50175	0.000111092	0.155053	1.11346	0.21455	0.0446593	0.000279699	0.305884
THOP1	4.99825	5.48638	4.90036	-0.488137	-1.40263	0.000388742	0.0978876	1.07021	0.405612	0.586024	1.5011	5.94568e-09	0.00313644	0.475223	1.92329e-07
THPO	1.58497	1.67542	1.60578	-0.0904426	-1.0647	0.351615	-0.0208068	-1.01453	0.803979	0.0696358	1.04945	0.318628	0.497304	0.841925	0.413176
TIA1	0.830338	0.843533	0.764734	-0.0131947	-1.00919	0.882627	0.0656044	1.04652	0.395781	0.0787992	1.05614	0.220687	0.932537	0.465239	0.312127
TIE1	4.50471	4.31313	4.38928	0.191578	1.14201	0.038247	0.115426	1.0833	0.147683	-0.0761518	-1.0542	0.250821	0.101326	0.192042	0.345122
TIMD4	3.26597	3.068	2.87221	0.197974	1.14709	0.172819	0.393763	1.31382	0.00182144	0.195789	1.14535	0.0611594	0.31788	0.00363264	0.115363
TIMP1	6.97795	6.80114	6.2164	0.176804	1.13038	0.182293	0.761549	1.69531	1.25719e-10	0.584745	1.49977	2.47075e-09	0.330173	1.55231e-09	1.25302e-07
TINAGL1	4.4812	4.3389	3.95539	0.142298	1.10366	0.19391	0.525807	1.43974	5.67584e-08	0.38351	1.30451	1.71985e-06	0.34419	3.05291e-07	2.03516e-05
SIGLEC7	2.72382	2.52521	2.47199	0.198604	1.14759	0.0201526	0.251833	1.19072	0.000691571	0.0532292	1.03758	0.384632	0.0633113	0.00147011	0.4842
SIRPA	6.46689	6.20957	6.07787	0.25732	1.19526	0.0825105	0.38902	1.3095	0.00250347	0.1317	1.09558	0.215938	0.185388	0.00478448	0.306632
PTGDS	4.7152	4.05908	4.07595	0.656119	1.57584	0.000493278	0.639249	1.55752	8.89637e-05	-0.0168704	-1.01176	0.899843	0.00357375	0.000228856	0.913646
PTN	0.553298	-0.0313149	-0.247551	0.584613	1.49964	0.000296905	0.800848	1.74212	1.63335e-08	0.216236	1.1617	0.0606594	0.00259649	9.9972e-08	0.115156
PTPRF	3.87019	3.7557	3.57029	0.114484	1.08259	0.203677	0.299901	1.23106	0.000137281	0.185416	1.13715	0.00440385	0.349302	0.0003338	0.0146109
PTPRS	2.54276	2.34961	2.42944	0.193152	1.14326	0.0189643	0.113321	1.08172	0.110217	-0.0798308	-1.05689	0.176146	0.0606516	0.146543	0.26055
TNC	4.00978	3.16775	2.80633	0.84203	1.79257	2.62016e-05	1.20345	2.30289	1.11988e-11	0.361418	1.28469	0.0113001	0.000664399	2.5202e-10	0.0303905
TNF	1.66746	1.63199	1.42462	0.0354753	1.02489	0.694832	0.242842	1.18332	0.00204017	0.207367	1.15458	0.00156072	0.799985	0.00402368	0.00637789
TNFRSF10C	3.07246	2.78815	2.68603	0.284311	1.21783	0.0205898	0.386432	1.30716	0.000295387	0.102122	1.07335	0.245849	0.0641172	0.000685375	0.34226
TNFSF13B	4.98173	5.01036	4.77313	-0.0286305	-1.02004	0.845124	0.208601	1.15557	0.100223	0.237232	1.17873	0.0249788	0.900958	0.134769	0.0583388
TNNI3	2.01557	1.20527	0.516721	0.810302	1.75358	0.00313004	1.49885	2.82618	6.74169e-10	0.688551	1.61166	0.000497993	0.0144307	6.838e-09	0.00242175
TSHB	1.64516	1.46337	1.53018	0.181788	1.13429	0.206673	0.114985	1.08296	0.354924	-0.0668034	-1.04739	0.518292	0.352735	0.419994	0.615363
TSPAN1	0.815762	0.520875	0.257839	0.294887	1.22679	0.0595777	0.557923	1.47215	4.48748e-05	0.263035	1.2	0.019632	0.146875	0.000122931	0.0487213
TYMP	5.53766	5.83456	5.28463	-0.296898	-1.2285	0.111411	0.253034	1.19171	0.116311	0.549932	1.46402	5.04711e-05	0.237563	0.154069	0.000344562
TYRO3	2.34994	2.26337	2.36193	0.0865733	1.06185	0.228895	-0.0119896	-1.00835	0.846879	-0.0985629	-1.07071	0.0572181	0.380665	0.876507	0.109207
UMOD	3.055	3.3622	3.55359	-0.307201	-1.2373	0.0401503	-0.498584	-1.41283	0.000132382	-0.191383	-1.14186	0.0751451	0.105247	0.000325407	0.13635
USP8	1.47796	1.28285	1.34425	0.195107	1.14481	0.372399	0.133712	1.09711	0.479104	-0.0613957	-1.04347	0.696118	0.521108	0.550427	0.774677
VAMP5	1.53993	1.51254	1.22314	0.0273898	1.01917	0.823583	0.316787	1.24555	0.00304676	0.289397	1.22213	0.00116452	0.885976	0.00569263	0.00498079
VASN	2.05109	1.93185	1.87683	0.119237	1.08616	0.0725402	0.174261	1.12839	0.00250459	0.0550246	1.03888	0.248392	0.171678	0.00478448	0.34311
VCAM1	4.19145	3.75668	3.60137	0.434776	1.3517	0.000146507	0.590081	1.50533	4.47954e-09	0.155305	1.11366	0.0570081	0.00185749	3.24538e-08	0.109207
VIM	1.61078	1.51752	1.12579	0.0932598	1.06678	0.559899	0.484988	1.39957	0.000510549	0.391728	1.31196	0.000739655	0.683038	0.00110515	0.0034101
VSIR	1.40309	1.28802	1.18021	0.115067	1.08303	0.321345	0.22288	1.16706	0.0266807	0.107814	1.07759	0.196529	0.469455	0.0431907	0.288296
VSTM2L	0.201048	0.1325	0.121017	0.0685476	1.04866	0.542894	0.0800308	1.05704	0.411058	0.0114832	1.00799	0.887244	0.671524	0.478444	0.912961
VWF	6.05032	5.9733	5.5334	0.0770193	1.05484	0.513229	0.516924	1.4309	6.45509e-07	0.439905	1.35651	3.68878e-07	0.648385	3.01521e-06	5.69356e-06
WASF1	0.749883	0.656337	0.741179	0.093546	1.06699	0.49352	0.00870425	1.00605	0.94119	-0.0848418	-1.06057	0.387891	0.630215	0.951666	0.486576
XG	2.37753	1.75359	1.69573	0.623943	1.54108	0.000539425	0.681801	1.60414	1.35305e-05	0.057857	1.04092	0.652253	0.00382991	4.32115e-05	0.73742
ZBTB17	1.69048	1.85035	1.32272	-0.159869	-1.11719	0.200828	0.367762	1.29035	0.000728856	0.527631	1.44156	1.06133e-08	0.347775	0.00153103	2.64941e-07
ITGB1	2.24556	2.15628	2.1429	0.0892804	1.06384	0.210439	0.102661	1.07375	0.0958779	0.0133806	1.00932	0.79382	0.357444	0.131535	0.846264
ITGB1BP2	2.638	2.27371	2.46403	0.364286	1.28724	0.196118	0.173966	1.12816	0.474464	-0.190321	-1.14102	0.347293	0.344663	0.546866	0.443485
ITGB2	4.94386	4.80421	4.74592	0.139653	1.10164	0.112736	0.197937	1.14706	0.00951783	0.058284	1.04123	0.356623	0.237563	0.0164021	0.453768
ITIH3	2.38652	2.29913	2.06544	0.0873862	1.06244	0.482551	0.321081	1.24927	0.00301809	0.233695	1.17584	0.00937462	0.620672	0.0056689	0.027445
KIT	1.24609	1.43521	1.53554	-0.189118	-1.14007	0.0207928	-0.289453	-1.22218	4.95801e-05	-0.100335	-1.07202	0.0874324	0.0641865	0.000134358	0.152899
KITLG	2.68213	2.31208	2.54547	0.370049	1.2924	0.0125203	0.136657	1.09935	0.283752	-0.233391	-1.1756	0.0283138	0.0428823	0.343795	0.0640216
KYAT1	4.46588	4.7267	4.15195	-0.260814	-1.19815	0.159074	0.31393	1.24309	0.0501248	0.574744	1.48941	2.0632e-05	0.300379	0.0750815	0.000159225
LACTB2	1.32945	1.27819	0.883913	0.0512587	1.03617	0.657428	0.445532	1.36182	1.12742e-05	0.394273	1.31428	3.16999e-06	0.777456	3.7405e-05	3.18643e-05
LBP	5.19182	5.31604	4.80432	-0.124225	-1.08992	0.399223	0.3875	1.30812	0.0025068	0.511725	1.42575	2.11096e-06	0.541589	0.00478448	2.34184e-05
LDLR	3.02036	3.04844	2.77405	-0.0280739	-1.01965	0.829412	0.24631	1.18617	0.0292942	0.274384	1.20948	0.00363562	0.886871	0.0462197	0.0127589
LEP	2.94178	2.74809	2.81124	0.193688	1.14368	0.482257	0.130541	1.0947	0.583516	-0.0631478	-1.04474	0.749949	0.620672	0.647338	0.814165
LEPR	0.488114	0.332393	0.292439	0.155722	1.11398	0.0224363	0.195676	1.14526	0.000950965	0.0399538	1.02808	0.413552	0.0680759	0.0019514	0.507996
LGALS1	3.54898	3.14312	2.76743	0.405859	1.32488	0.00280108	0.781549	1.71898	9.21906e-11	0.37569	1.29746	0.000128557	0.0136217	1.25876e-09	0.000773521
LGALS3	4.14356	4.14133	3.76956	0.00223742	1.00155	0.982794	0.374004	1.29594	3.88508e-05	0.371766	1.29394	1.03349e-06	0.991156	0.000109461	1.41112e-05
LILRA5	4.84827	4.70629	4.41336	0.141986	1.10342	0.171941	0.434911	1.35183	1.93848e-06	0.292924	1.22512	0.000105984	0.31788	7.82e-06	0.000660074
LILRB1	4.1454	4.2013	4.07485	-0.0559024	-1.03951	0.635257	0.0705507	1.05012	0.488458	0.126453	1.09161	0.136294	0.756766	0.557565	0.213146
LILRB2	6.84168	6.67801	6.53991	0.163671	1.12013	0.117193	0.301768	1.23265	0.000901158	0.138097	1.10045	0.0662174	0.243296	0.00187083	0.123074
LILRB5	5.88184	6.01641	5.99972	-0.134575	-1.09777	0.445515	-0.117886	-1.08514	0.439205	0.0166895	1.01164	0.895268	0.583608	0.507875	0.913646
LPL	5.14751	4.41661	4.58131	0.730901	1.65968	3.19731e-06	0.566207	1.48063	2.77839e-05	-0.164695	-1.12093	0.137933	0.000189174	8.28849e-05	0.213826
LRMP	1.6203	1.61924	1.46836	0.00106656	1.00074	0.994658	0.151943	1.11106	0.270042	0.150876	1.11024	0.188393	0.994658	0.329956	0.277508
LRP11	2.83212	2.59325	2.39518	0.238873	1.18007	0.0457501	0.436938	1.35373	2.88665e-05	0.198065	1.14716	0.0213853	0.116844	8.46909e-05	0.0512958
LTBP2	5.82968	5.15286	4.38888	0.676819	1.59861	0.000177508	1.4408	2.71472	1.97337e-18	0.763984	1.69817	7.04302e-09	0.00202285	7.00546e-16	1.92329e-07
MARCO	4.50559	4.47022	4.50642	0.035372	1.02482	0.707321	-0.000822449	-1.00057	0.991937	-0.0361944	-1.02541	0.593182	0.809997	0.991937	0.677105
MB	6.62348	5.47985	4.66257	1.14363	2.20936	0.000205134	1.9609	3.89306	9.29441e-13	0.817277	1.76208	0.000223986	0.00202285	2.99956e-11	0.00120477
MCAM	0.868483	0.584451	0.551313	0.284033	1.21759	0.00019778	0.317171	1.24588	1.79994e-06	0.033138	1.02324	0.5414	0.00202285	7.34459e-06	0.638529
MCFD2	3.4881	2.98329	2.52668	0.504817	1.41894	0.000655194	0.961426	1.94723	3.97694e-13	0.456609	1.37231	2.01605e-05	0.00438856	1.76477e-11	0.000159044
MEGF9	4.55458	4.74165	4.72499	-0.187071	-1.13845	0.0086571	-0.170405	-1.12537	0.00567007	0.0166665	1.01162	0.743579	0.0316832	0.010166	0.812657
MEP1B	0.354614	0.749382	0.807109	-0.394768	-1.31473	0.00477331	-0.452495	-1.3684	0.000194871	-0.0577271	-1.04082	0.563578	0.0197038	0.000467426	0.660297
MET	4.95206	5.07122	4.93104	-0.119158	-1.0861	0.119088	0.0210223	1.01468	0.749807	0.140181	1.10204	0.0110386	0.244372	0.802652	0.0303775
MFAP3	0.215721	0.148912	0.170356	0.0668095	1.0474	0.370256	0.0453653	1.03194	0.481186	-0.0214442	-1.01497	0.68903	0.521108	0.551036	0.769371
MFAP5	3.2556	2.71378	2.73446	0.541821	1.45581	0.000828925	0.521137	1.43509	0.000204341	-0.0206837	-1.01444	0.857837	0.0049876	0.000486853	0.897643
MMP7	1.56653	1.25948	1.03546	0.307046	1.23717	0.0216219	0.531061	1.44499	5.62766e-06	0.224016	1.16798	0.0197909	0.0661704	2.018e-05	0.0487213
MNDA	2.55828	2.39214	1.73667	0.166136	1.12205	0.382881	0.821613	1.76738	9.63116e-07	0.655477	1.57514	2.55912e-06	0.5285	4.22107e-06	2.75299e-05
MPHOSPH8	0.961488	0.969088	0.519161	-0.00759996	-1.00528	0.945664	0.442327	1.35879	6.36209e-06	0.449927	1.36597	4.43664e-08	0.981346	2.23119e-05	8.28951e-07
MSMB	0.671798	0.246006	0.0603097	0.425792	1.34331	0.00439615	0.611488	1.52783	2.86417e-06	0.185696	1.13737	0.0827656	0.018579	1.11734e-05	0.146909
MSTN	0.491243	0.890927	0.996074	-0.399684	-1.31922	0.00471849	-0.504831	-1.41896	4.1184e-05	-0.105147	-1.0756	0.298456	0.0197038	0.000114221	0.395343
MTPN	0.147245	0.139242	0.0654546	0.00800345	1.00556	0.881045	0.0817906	1.05833	0.0774669	0.0737872	1.05248	0.0557611	0.932537	0.110003	0.10817
NADK	5.19417	5.75049	4.5552	-0.556315	-1.47051	0.00947296	0.638968	1.55722	0.000593123	1.19528	2.2899	9.99181e-14	0.033629	0.00126843	3.54709e-11
NCAM1	1.68558	1.55712	1.57024	0.128457	1.09312	0.0756146	0.115335	1.08323	0.0648816	-0.0131214	-1.00914	0.800235	0.174306	0.0940121	0.850549
NECTIN2	6.47733	6.05423	5.76844	0.4231	1.34081	0.00575305	0.708884	1.63454	1.39357e-07	0.285783	1.21907	0.00943179	0.0226926	7.06737e-07	0.027445
NID1	4.673	4.75295	4.37301	-0.0799546	-1.05698	0.454075	0.29999	1.23114	0.00126076	0.379945	1.30129	1.21309e-06	0.592635	0.00255754	1.48499e-05
NOTCH1	5.87626	5.83063	5.78693	0.0456389	1.03214	0.444167	0.0893316	1.06388	0.0836073	0.0436927	1.03075	0.308497	0.583608	0.117315	0.404119
NOTCH3	3.12482	2.71081	2.45395	0.414015	1.33239	0.000299877	0.670873	1.59204	3.8808e-11	0.256858	1.19487	0.00176019	0.00259649	6.5604e-10	0.00702097
NPDC1	3.12584	2.31205	2.02391	0.813782	1.75781	1.93696e-05	1.10192	2.14641	5.47454e-11	0.288142	1.22107	0.0333485	0.000573017	8.44983e-10	0.0726302
NPPB	3.58879	2.1423	1.60625	1.4465	2.72546	5.68391e-05	1.98254	3.95189	3.76002e-10	0.536045	1.44999	0.0361528	0.000928652	4.17127e-09	0.07741
NPTXR	2.46422	2.33608	2.31808	0.128146	1.09289	0.41011	0.146141	1.10661	0.277102	0.017995	1.01255	0.872134	0.551473	0.336888	0.905285
NRCAM	4.30428	4.26585	4.11311	0.0384263	1.02699	0.762163	0.191165	1.14169	0.0821283	0.152738	1.11168	0.0950721	0.838181	0.115697	0.163072
NRP1	1.94437	1.88537	1.73925	0.0590004	1.04174	0.435869	0.205116	1.15278	0.00185884	0.146116	1.10659	0.00760435	0.579526	0.00368653	0.0228775
NTproBNP	3.36727	1.88149	1.15212	1.48577	2.80067	6.32464e-05	2.21515	4.64329	1.64269e-11	0.729375	1.65792	0.0059525	0.000976194	3.23976e-10	0.0187003
NTRK2	1.03645	0.907084	0.920207	0.129366	1.09381	0.0999508	0.116243	1.08391	0.0871386	-0.0131236	-1.00914	0.81607	0.217684	0.121311	0.862217
OLR1	3.11123	2.95894	2.57991	0.152283	1.11133	0.280563	0.531317	1.44525	1.74372e-05	0.379034	1.30047	0.000218591	0.440708	5.33639e-05	0.00119385
OSMR	0.79729	0.711166	0.623306	0.0861248	1.06152	0.0748071	0.173984	1.12817	3.81527e-05	0.0878595	1.06279	0.0117023	0.173572	0.000109227	0.0312354
PAG1	4.00587	3.91589	3.25281	0.0899825	1.06436	0.552942	0.753064	1.68537	2.13493e-08	0.663081	1.58346	3.47276e-09	0.676877	1.26317e-07	1.54104e-07
PAM	4.3825	4.21589	4.13335	0.166617	1.12242	0.0659137	0.249152	1.18851	0.00154804	0.0825351	1.05888	0.204526	0.16026	0.00310482	0.297568
PCDH17	1.789	1.53307	1.40225	0.255935	1.19411	0.0125627	0.386752	1.30745	1.55611e-05	0.130818	1.09491	0.0752807	0.0428823	4.8458e-05	0.13635
PCOLCE	4.42985	4.25524	4.35809	0.174609	1.12866	0.223914	0.0717544	1.05099	0.562562	-0.102855	-1.0739	0.318902	0.376727	0.631992	0.413176
PCSK9	3.04244	3.05425	2.63326	-0.0118106	-1.00822	0.915409	0.409172	1.32792	2.69976e-05	0.420982	1.33884	2.60301e-07	0.955795	8.12217e-05	4.40032e-06
PDCD6	2.48246	2.46714	2.34715	0.0153198	1.01068	0.891275	0.135311	1.09833	0.162952	0.119991	1.08673	0.137219	0.93888	0.208837	0.213652
PDGFA	1.58147	2.0565	1.93083	-0.475028	-1.38995	0.009786	-0.349364	-1.274	0.0276332	0.125664	1.09101	0.339598	0.0343963	0.0442483	0.435225
PDGFRA	2.36156	1.81457	1.58066	0.546993	1.46104	7.13329e-07	0.780908	1.71821	2.18638e-15	0.233916	1.17602	0.00281418	6.33079e-05	1.55233e-13	0.0104066
PDGFRB	2.69071	2.52507	2.5694	0.165634	1.12166	0.0500723	0.121306	1.08772	0.0964234	-0.0443279	-1.0312	0.464624	0.126969	0.131655	0.561025
PEAR1	1.09612	1.006	1.02578	0.0901199	1.06446	0.0733233	0.0703459	1.04997	0.105489	-0.019774	-1.0138	0.583839	0.172383	0.140784	0.669494
PGLYRP1	5.82163	5.27495	5.00359	0.546682	1.46072	0.000823369	0.81804	1.76301	1.26163e-08	0.271357	1.20694	0.0203324	0.0049876	8.14324e-08	0.0494385
PILRB	3.1845	2.52809	2.33951	0.656408	1.57615	0.000370405	0.844994	1.79626	1.60857e-07	0.188586	1.13965	0.151242	0.003058	8.04285e-07	0.233438
PLA2G1B	4.76302	4.47813	4.20726	0.284887	1.21831	0.0772695	0.555759	1.46994	7.87557e-05	0.270872	1.20654	0.0197169	0.175838	0.000205576	0.0487213
PLA2G2A	4.65434	4.46791	3.203	0.186426	1.13794	0.525171	1.45134	2.73462	2.40074e-08	1.26491	2.40313	5.55892e-09	0.658783	1.37462e-07	1.92329e-07
PLAT	5.16105	4.70383	4.19602	0.457217	1.37289	0.00523519	0.965024	1.9521	3.63933e-11	0.507807	1.42189	1.90934e-05	0.0211192	6.5604e-10	0.000154049
PLIN3	2.26039	2.08252	1.59235	0.177867	1.13121	0.126385	0.668039	1.58891	1.26808e-10	0.490172	1.40461	1.11947e-08	0.253485	1.55231e-09	2.64941e-07
PLPBP	2.74283	2.75647	2.37617	-0.0136392	-1.0095	0.947983	0.366662	1.28937	0.0430575	0.380301	1.30161	0.0118511	0.981346	0.0664583	0.0313967
PLTP	2.90583	2.71796	2.71373	0.187874	1.13908	0.140201	0.192101	1.14243	0.0810722	0.00422705	1.00293	0.963121	0.271974	0.114664	0.974096
PLXNB2	5.74182	5.64394	5.34587	0.0978835	1.0702	0.320406	0.395956	1.31581	4.74818e-06	0.298073	1.2295	3.30441e-05	0.469455	1.77432e-05	0.000234613
PLXNB3	0.925474	0.861364	0.818564	0.0641096	1.04544	0.375342	0.10691	1.07692	0.0876097	0.0427999	1.03011	0.41042	0.521108	0.12149	0.5059
PON2	-0.0934619	-0.0183597	-0.0795276	-0.0751022	-1.05344	0.299598	-0.0139344	-1.00971	0.823569	0.0611678	1.04331	0.240141	0.448764	0.858551	0.338294
PPIB	0.816267	0.926894	0.724712	-0.110627	-1.0797	0.496056	0.0915544	1.06552	0.514344	0.202182	1.15044	0.0842536	0.631182	0.583361	0.148806
PPP1R2	1.77863	1.63621	1.19829	0.142423	1.10376	0.28592	0.580342	1.4952	7.95789e-07	0.437919	1.35465	7.07871e-06	0.44428	3.53132e-06	6.28235e-05
PRCP	2.62532	2.95077	2.83675	-0.32545	-1.25306	0.00150804	-0.211427	-1.15783	0.0166354	0.114024	1.08224	0.119716	0.00836493	0.0278564	0.194061
PRKAR1A	3.49393	3.17075	3.06214	0.32318	1.25108	0.151111	0.43179	1.34891	0.0267661	0.10861	1.07819	0.501667	0.288583	0.0431907	0.60069
PROC	2.89184	3.13679	3.31073	-0.244942	-1.18505	0.00309231	-0.418883	-1.33689	9.55221e-09	-0.17394	-1.12814	0.0034756	0.0144307	6.52122e-08	0.0123384
PRSS2	3.39166	2.77513	2.54948	0.616532	1.53319	0.00250932	0.84218	1.79276	2.28957e-06	0.225648	1.1693	0.121877	0.0127014	9.13257e-06	0.196358
PRSS27	2.80679	2.71076	2.70883	0.0960284	1.06883	0.41251	0.0979554	1.07026	0.333362	0.00192705	1.00134	0.981744	0.552607	0.39963	0.981744
PRTN3	3.567	3.43368	3.00405	0.133329	1.09682	0.343768	0.562958	1.4773	5.33422e-06	0.42963	1.34689	2.85929e-05	0.492087	1.94223e-05	0.000211468
ACAN	2.80744	2.52948	2.37213	0.277959	1.21248	0.00838	0.435313	1.3522	2.37837e-06	0.157354	1.11524	0.0375147	0.0309885	9.38135e-06	0.0792721
ACE2	1.70165	1.8219	1.25283	-0.120258	-1.08693	0.488582	0.448818	1.36492	0.0029671	0.569076	1.48357	7.33058e-06	0.626161	0.00560277	6.34721e-05
ACOX1	0.160664	0.173639	0.121716	-0.0129745	-1.00903	0.856995	0.0389485	1.02736	0.531346	0.051923	1.03665	0.316293	0.910878	0.600726	0.412808
ACP5	4.32619	4.53138	4.19768	-0.205198	-1.15284	0.0890794	0.128505	1.09316	0.217245	0.333703	1.26024	0.000139861	0.197604	0.268718	0.000827514
ACTA2	0.86805	0.221654	-0.134957	0.646396	1.56525	4.1522e-05	1.00301	2.00417	8.59417e-13	0.35661	1.28041	0.00156303	0.000867077	2.99956e-11	0.00637789
ACY1	3.70246	4.34786	3.6886	-0.6454	-1.56417	0.003175	0.0138658	1.00966	0.941092	0.659266	1.57928	3.16702e-05	0.0144503	0.951666	0.000229447
ADA2	5.37336	5.12754	5.16791	0.245818	1.18577	0.0530044	0.205448	1.15304	0.0611837	-0.0403704	-1.02838	0.657605	0.132511	0.0891334	0.738766
ADAM15	3.48936	3.45764	3.39869	0.0317147	1.02223	0.723858	0.0906713	1.06487	0.24282	0.0589565	1.04171	0.361313	0.815776	0.298274	0.458093
ADAMTS13	3.8424	4.07868	4.20063	-0.236277	-1.17795	0.00254759	-0.358228	-1.28185	1.82826e-07	-0.121951	-1.08821	0.0297082	0.0127014	9.01433e-07	0.0663297
ADAMTS16	0.583212	0.40533	0.310636	0.177882	1.13122	0.0129115	0.272576	1.20796	1.28511e-05	0.0946936	1.06784	0.0650561	0.0436531	4.14739e-05	0.121552
ADGRG2	2.87349	2.89458	2.96497	-0.0210871	-1.01472	0.826122	-0.0914764	-1.06546	0.270471	-0.0703892	-1.05	0.308222	0.886022	0.329956	0.404119
ADH4	2.2958	2.96477	2.65961	-0.668966	-1.58993	0.00909625	-0.363814	-1.28682	0.0994412	0.305152	1.23555	0.0968525	0.0328088	0.1347	0.165301
AGXT	1.53663	2.29878	1.65038	-0.762149	-1.69602	0.00114165	-0.113753	-1.08204	0.570845	0.648396	1.56743	0.000125245	0.00653684	0.639274	0.000766588
AHCY	2.00838	2.07124	1.6142	-0.062854	-1.04453	0.621721	0.394183	1.3142	0.000392345	0.457037	1.37272	9.98357e-07	0.748172	0.000870516	1.41112e-05
AK1	2.73602	2.72635	2.20114	0.00967068	1.00673	0.971092	0.534884	1.44883	0.0209017	0.525213	1.43915	0.00652194	0.989176	0.0345121	0.020133
AKR1C4	0.482767	0.646778	0.45132	-0.164011	-1.1204	0.108064	0.0314463	1.02204	0.720826	0.195457	1.14509	0.00796717	0.232501	0.777791	0.0237676
ALCAM	1.90017	1.81517	1.71252	0.0849995	1.06069	0.28186	0.187648	1.13891	0.00622899	0.102648	1.07374	0.0711957	0.440794	0.0110565	0.130956
AMY2A	1.86373	1.62724	1.61309	0.236495	1.17813	0.13456	0.250638	1.18973	0.0666717	0.014143	1.00985	0.900777	0.266864	0.0960541	0.913646
AMY2B	1.73814	1.53841	1.5194	0.199728	1.14848	0.199575	0.218736	1.16371	0.104216	0.0190084	1.01326	0.865002	0.347299	0.13961	0.900515
ANG	7.04158	7.00184	7.05557	0.0397389	1.02793	0.719285	-0.0139917	-1.00975	0.883536	-0.0537305	-1.03795	0.499263	0.814941	0.911788	0.60069
ANGPTL1	2.68896	2.55749	2.07974	0.131477	1.09541	0.293519	0.609224	1.52544	3.83318e-08	0.477747	1.39257	2.04981e-07	0.448764	2.09351e-07	3.63842e-06
ANGPTL3	4.4258	4.3142	4.30389	0.111601	1.08043	0.286592	0.121912	1.08818	0.178094	0.0103108	1.00717	0.890994	0.44428	0.225797	0.913646
ANPEP	1.29427	1.35494	1.30078	-0.0606689	-1.04295	0.505939	-0.00650714	-1.00452	0.934162	0.0541617	1.03826	0.408983	0.641459	0.950222	0.505885
ANXA4	0.433388	0.460782	0.376763	-0.027394	-1.01917	0.686392	0.0566253	1.04003	0.334338	0.0840193	1.05997	0.0857581	0.799985	0.39963	0.150713
AOC3	1.70215	1.5742	1.52728	0.127955	1.09274	0.150363	0.174869	1.12886	0.0232497	0.0469139	1.03305	0.462773	0.288583	0.0382113	0.560698
APLP1	1.24164	1.13061	1.45027	0.111034	1.08	0.309794	-0.208628	-1.15559	0.0276707	-0.319662	-1.24804	5.92719e-05	0.458237	0.0442483	0.000382573
APOM	2.91811	3.04117	3.33	-0.123062	-1.08904	0.245125	-0.411895	-1.33043	9.22356e-06	-0.288834	-1.22165	0.000174201	0.393752	3.08902e-05	0.00101379
ART3	2.16995	1.80019	1.6605	0.36976	1.29214	0.00359635	0.509443	1.4235	4.33939e-06	0.139683	1.10166	0.124189	0.0157618	1.63881e-05	0.19859
AXL	2.91811	2.76467	2.75106	0.153447	1.11222	0.111976	0.167052	1.12276	0.045464	0.0136049	1.00947	0.844312	0.237563	0.0695677	0.886778
AZU1	2.68535	2.50263	2.01694	0.182719	1.13502	0.393401	0.66841	1.58932	0.000346679	0.485691	1.40026	0.00174033	0.538096	0.000783893	0.00702064
BAG6	4.47718	4.48402	4.11306	-0.0068462	-1.00476	0.961713	0.364121	1.2871	0.00334476	0.370967	1.29322	0.000344796	0.986729	0.00612057	0.00175077
BLMH	2.85532	3.10644	2.51949	-0.251118	-1.19013	0.0568211	0.335833	1.26211	0.00332299	0.586951	1.50207	1.69978e-09	0.141059	0.00612057	1.00571e-07
BMP6	2.4342	2.3161	2.19656	0.118107	1.08531	0.151201	0.237643	1.17906	0.000906688	0.119536	1.08639	0.0437076	0.288583	0.00187136	0.088664
BOC	1.7002	1.46259	1.50644	0.237618	1.17904	0.0286263	0.193766	1.14375	0.0387676	-0.0438522	-1.03086	0.572888	0.0819544	0.0606278	0.666804
BPIFB1	5.98904	5.60494	5.68773	0.384096	1.30504	0.0285005	0.30131	1.23226	0.0465668	-0.0827853	-1.05906	0.509945	0.0819544	0.0707095	0.607485
C1QTNF1	3.68692	3.71794	3.29683	-0.0310168	-1.02173	0.783061	0.390084	1.31047	7.60821e-05	0.421101	1.33895	3.62299e-07	0.855343	0.000200068	5.69356e-06
C2	4.93148	4.99203	4.90802	-0.060545	-1.04286	0.570351	0.0234675	1.0164	0.798973	0.0840125	1.05996	0.273774	0.693406	0.841199	0.366753
CA1	8.0907	8.08346	7.65433	0.00723643	1.00503	0.978077	0.436371	1.3532	0.0558394	0.429135	1.34643	0.0240197	0.989223	0.0822531	0.0568174
CA13	1.80654	1.50468	1.6452	0.301867	1.23274	0.189507	0.161347	1.11833	0.41654	-0.140519	-1.1023	0.395274	0.338066	0.48324	0.492359
CA3	7.31104	6.57763	5.85231	0.733406	1.66256	0.0135329	1.45873	2.74866	2.57956e-08	0.725322	1.65327	0.000721282	0.0448989	1.45356e-07	0.00336914
CA4	2.34469	2.3135	2.13613	0.0311905	1.02185	0.713661	0.208556	1.15553	0.00477894	0.177365	1.13082	0.00394817	0.812018	0.00861179	0.0133486
CA5A	2.63816	2.93547	2.18462	-0.297315	-1.22886	0.298351	0.453539	1.3694	0.066832	0.750854	1.68279	0.000298837	0.448764	0.0960541	0.00158339
CANT1	3.51837	3.49368	3.41006	0.0246885	1.01726	0.744217	0.108306	1.07796	0.0983013	0.0836178	1.05967	0.125037	0.830809	0.133705	0.19905
CASP3	3.07833	3.09311	2.83357	-0.0147825	-1.0103	0.948174	0.244758	1.18489	0.213452	0.25954	1.1971	0.11323	0.981346	0.264949	0.186019
CBLIF	1.97794	1.41155	1.64844	0.566391	1.48081	0.00560842	0.329497	1.25658	0.0612635	-0.236894	-1.17845	0.105681	0.0223707	0.0891334	0.176247
CCDC80	4.92116	4.4831	4.00522	0.438063	1.35478	0.00503435	0.915939	1.8868	4.44779e-11	0.477876	1.39269	2.44237e-05	0.0205425	7.17712e-10	0.000184477
CCL14	6.82656	6.46926	6.33378	0.357293	1.28102	0.00818085	0.492779	1.40715	2.85403e-05	0.135486	1.09846	0.161377	0.0305705	8.44317e-05	0.244824
CCL15	6.92827	6.68248	6.44629	0.245798	1.18575	0.137153	0.481982	1.39666	0.00081198	0.236185	1.17787	0.0473031	0.268599	0.00169561	0.0932922
CCL16	4.89277	4.58157	4.91591	0.311199	1.24074	0.175602	-0.0231447	-1.01617	0.907041	-0.334344	-1.2608	0.0433898	0.319685	0.927952	0.0885251
CCL27	3.55379	3.05842	2.93525	0.495375	1.40969	0.00126261	0.61854	1.53532	3.88081e-06	0.123165	1.08912	0.26127	0.00711471	1.48138e-05	0.356734
CCN3	3.54369	2.61946	2.41195	0.924231	1.89767	8.2221e-06	1.13174	2.19123	4.93668e-10	0.207512	1.1547	0.157553	0.000364856	5.31067e-09	0.241084
CD14	7.5363	7.40507	7.19782	0.131225	1.09522	0.384093	0.338484	1.26443	0.00971352	0.207259	1.15449	0.05649	0.5285	0.0166584	0.108989
CD163	3.32645	3.2395	3.06453	0.0869455	1.06212	0.439604	0.261916	1.19907	0.0073593	0.174971	1.12894	0.0311031	0.580147	0.0128697	0.0690101
CD209	4.02556	3.8472	3.70439	0.178357	1.13159	0.0642614	0.321172	1.24934	0.000132913	0.142815	1.10406	0.0394806	0.15733	0.000325407	0.0821263
CD2AP	4.58201	4.32168	4.22405	0.260328	1.19775	0.294898	0.357954	1.28161	0.0959649	0.097626	1.07001	0.584628	0.448764	0.131535	0.669494
CD46	4.24816	3.91601	3.80454	0.332154	1.25889	0.0025388	0.443615	1.36001	3.85318e-06	0.111462	1.08032	0.156447	0.0127014	1.48138e-05	0.240427
CD55	3.66625	3.42903	3.17603	0.237217	1.17872	0.0376804	0.490219	1.40466	1.00542e-06	0.253002	1.19168	0.00214339	0.101326	4.35272e-06	0.00827067
CD59	4.71165	4.15504	3.83857	0.556606	1.47081	0.000755754	0.873072	1.83156	2.08488e-09	0.316465	1.24528	0.00752088	0.00480497	1.72124e-08	0.0228775
CD69	4.94514	4.59131	4.83404	0.353831	1.27795	0.238273	0.111105	1.08006	0.66788	-0.242726	-1.18323	0.260501	0.387642	0.727293	0.356734
CD93	4.37633	3.96656	3.81309	0.409775	1.32848	0.000757968	0.56324	1.47758	1.26381e-07	0.153465	1.11224	0.077383	0.00480497	6.50224e-07	0.139447
CD97	4.62256	4.39308	4.21551	0.22948	1.17241	0.0430244	0.407045	1.32597	3.95131e-05	0.177564	1.13097	0.0295344	0.110679	0.00011045	0.0663297
CDH1	2.6641	2.43243	2.24163	0.23167	1.17419	0.0289244	0.422472	1.34022	5.36164e-06	0.190802	1.1414	0.0124528	0.0821453	1.94223e-05	0.0327463
CDH17	0.383448	0.113804	0.164856	0.269643	1.20551	0.0168311	0.218592	1.1636	0.0248163	-0.0510511	-1.03602	0.527272	0.0543185	0.0405981	0.623939
CDH2	2.43575	2.43227	2.14069	0.00347896	1.00241	0.975244	0.295058	1.22693	0.0024999	0.291579	1.22398	0.000345223	0.989176	0.00478448	0.00175077
CDH5	1.80491	1.57934	1.68777	0.225575	1.16924	0.00307829	0.117146	1.08459	0.0738705	-0.108429	-1.07805	0.0469735	0.0144307	0.105742	0.0931597
CDH6	1.22699	0.893636	0.890462	0.333352	1.25994	0.00161649	0.336526	1.26271	0.000239445	0.00317358	1.0022	0.966427	0.0087102	0.000566685	0.974663
CDHR5	2.44153	2.55768	2.73805	-0.116153	-1.08384	0.305678	-0.29652	-1.22818	0.00264068	-0.180367	-1.13317	0.0274459	0.454351	0.00501306	0.0628599
CEACAM8	3.35791	2.7048	2.18736	0.653114	1.57256	0.00105278	1.17056	2.25099	3.83537e-11	0.517444	1.43142	0.000314751	0.00612683	6.5604e-10	0.00164318
CEBPB	0.548381	0.643869	0.332613	-0.0954877	-1.06843	0.292474	0.215768	1.16132	0.00616677	0.311256	1.24079	2.73527e-06	0.448764	0.011001	2.85595e-05
CELA3A	3.42021	3.49069	3.23698	-0.0704806	-1.05007	0.668128	0.183237	1.13543	0.197557	0.253718	1.19228	0.0324762	0.785383	0.246947	0.071167
CES1	4.64981	5.34063	4.76232	-0.69082	-1.6142	0.00335706	-0.112506	-1.0811	0.577725	0.578314	1.4931	0.000658858	0.0148969	0.642968	0.0031186
CGREF1	2.9328	2.37559	2.07905	0.557212	1.47142	0.000649526	0.853752	1.80719	3.04148e-09	0.29654	1.2282	0.0112511	0.00438856	2.39939e-08	0.0303905
CHI3L1	5.14662	4.13486	2.90727	1.01176	2.01637	0.000474786	2.23935	4.72183	1.78033e-17	1.22759	2.34175	6.9532e-09	0.00351144	3.16008e-15	1.92329e-07
CHIT1	5.75774	4.77779	4.49855	0.979946	1.97239	0.00806629	1.25919	2.39361	9.10978e-05	0.27924	1.21356	0.291402	0.0304631	0.00023266	0.388901
CHL1	2.36406	2.00545	2.10082	0.358605	1.28219	0.000164069	0.26324	1.20017	0.00131545	-0.0953651	-1.06834	0.159106	0.00200843	0.00265332	0.242415
CHRDL2	2.69707	2.37462	2.1191	0.322447	1.25045	0.0338486	0.577971	1.49275	1.36329e-05	0.255524	1.19377	0.0194594	0.0931494	4.32115e-05	0.0487213
CLC	1.13236	0.599227	0.631129	0.533135	1.44707	7.08201e-06	0.501233	1.41542	1.10023e-06	-0.0319017	-1.02236	0.703916	0.000359159	4.59507e-06	0.780907
CLEC1A	2.0817	1.8256	1.64062	0.256098	1.19424	0.0274656	0.44108	1.35762	1.39688e-05	0.184982	1.1368	0.0267784	0.0799204	4.38843e-05	0.0617293
CLEC5A	3.19548	3.02765	2.42545	0.167822	1.12336	0.232452	0.770025	1.7053	7.69759e-10	0.602203	1.51803	6.62054e-09	0.381812	7.38552e-09	1.92329e-07
CLTA	0.996612	0.944785	0.530176	0.0518268	1.03658	0.550391	0.466436	1.38169	1.5818e-09	0.414609	1.33294	1.3615e-10	0.676086	1.40384e-08	9.66666e-09
CLUL1	2.37702	2.02709	2.23259	0.349936	1.2745	0.000627553	0.144434	1.1053	0.0997917	-0.205503	-1.15309	0.00508455	0.00436826	0.1347	0.0167131
CNDP1	0.819157	0.980687	1.05334	-0.161529	-1.11847	0.118265	-0.234184	-1.17624	0.00900558	-0.0726542	-1.05165	0.327905	0.244094	0.015595	0.423296
CNPY2	0.80396	0.791287	0.672638	0.012673	1.00882	0.896554	0.131321	1.0953	0.11963	0.118648	1.08572	0.091244	0.941647	0.157291	0.158783
CNST	2.4127	1.90151	2.49771	0.51119	1.42523	0.126385	-0.0850105	-1.0607	0.768169	-0.596201	-1.51173	0.0134556	0.253485	0.817221	0.0348668
CNTN1	1.65466	1.52021	1.57197	0.134447	1.09767	0.052263	0.08269	1.05899	0.166392	-0.051757	-1.03653	0.297664	0.131584	0.211838	0.395343
COL18A1	6.43166	6.13208	5.97697	0.299583	1.23079	0.0252998	0.454691	1.37049	9.76598e-05	0.155108	1.11351	0.106572	0.0754743	0.000247637	0.176247
COL1A1	0.511014	0.379257	0.395666	0.131758	1.09563	0.0312276	0.115348	1.08324	0.0290619	-0.0164096	-1.01144	0.708026	0.0879824	0.0460579	0.783019
COL4A1	4.14652	3.88636	3.68045	0.260167	1.19762	0.0267315	0.466076	1.38135	5.78216e-06	0.205909	1.15341	0.014835	0.0790807	2.05267e-05	0.0381625
COL6A3	6.32485	5.44047	5.10748	0.884385	1.84598	0.000110915	1.21737	2.32523	1.46917e-09	0.332987	1.25962	0.0411234	0.00145832	1.33732e-08	0.0848768
COMP	5.45098	4.83412	4.85159	0.616864	1.53354	1.00762e-05	0.599396	1.51508	7.59292e-07	-0.0174684	-1.01218	0.859714	0.000395583	3.41201e-06	0.897643
COMT	3.6778	3.43353	3.05764	0.244267	1.18449	0.298148	0.620164	1.53705	0.00239061	0.375897	1.29765	0.0264503	0.448764	0.00466301	0.0613716
CORO1A	1.43295	1.26268	1.11241	0.170266	1.12527	0.305887	0.32054	1.2488	0.0261545	0.150274	1.10978	0.209046	0.454351	0.042591	0.301672
CPA1	5.97356	5.589	5.64682	0.384564	1.30547	0.0345523	0.326742	1.25418	0.0376324	-0.0578219	-1.04089	0.657386	0.0943545	0.0591129	0.738766
CPB1	2.38906	1.86134	1.89828	0.52772	1.44165	0.00161936	0.490782	1.40521	0.000701297	-0.0369379	-1.02593	0.757028	0.0087102	0.00148191	0.815803
CR2	2.84764	2.74285	3.05784	0.104785	1.07533	0.418942	-0.210207	-1.15685	0.0611593	-0.314992	-1.244	0.000809732	0.559114	0.0891334	0.00367692
CRTAC1	1.60927	1.34744	1.5644	0.261824	1.19899	0.0668125	0.044865	1.03159	0.715469	-0.216959	-1.16228	0.0348263	0.16026	0.775827	0.0753862
CRX	-0.10299	0.029391	0.0618791	-0.132382	-1.0961	0.336764	-0.16487	-1.12106	0.166487	-0.032488	-1.02277	0.742861	0.484012	0.211838	0.812657
CST3	7.74153	6.95984	6.74264	0.781684	1.71914	3.66813e-05	0.998893	1.99847	1.87943e-09	0.217209	1.16248	0.106458	0.000813867	1.58857e-08	0.176247
CST6	3.65193	3.24241	3.03945	0.40952	1.32824	0.0252619	0.612478	1.52888	0.000122118	0.202958	1.15106	0.12224	0.0754743	0.00030316	0.196358
CSTB	3.55374	3.05085	2.43792	0.502889	1.41705	0.00659603	1.11582	2.16718	1.41968e-11	0.612928	1.52936	5.27412e-06	0.0257318	2.96463e-10	4.8008e-05
CTF1	0.125493	0.270057	0.0645474	-0.144564	-1.1054	0.330718	0.0609454	1.04315	0.634844	0.205509	1.15309	0.0550322	0.481168	0.699905	0.107343
CTSB	3.2782	3.01848	2.57448	0.259729	1.19725	0.0680447	0.703721	1.6287	2.26568e-08	0.443992	1.36036	1.83577e-05	0.16212	1.31855e-07	0.000151558
CTSD	2.29991	2.25995	2.0153	0.0399558	1.02808	0.720821	0.284608	1.21808	0.00343551	0.244652	1.18481	0.00252413	0.814941	0.00625439	0.00963512
CTSH	3.41644	3.63873	3.36552	-0.222289	-1.16658	0.17189	0.0509141	1.03592	0.71682	0.273203	1.20849	0.0199002	0.31788	0.775827	0.0487213
CTSL	5.20457	5.06081	4.49405	0.143752	1.10477	0.289044	0.710517	1.63639	3.69962e-09	0.566765	1.4812	1.47301e-08	0.446133	2.7944e-08	3.26823e-07
CTSZ	1.76082	1.67908	1.45069	0.0817361	1.05829	0.401234	0.310131	1.23982	0.000264152	0.228395	1.17153	0.00121357	0.541589	0.000616933	0.00512879
CXCL16	6.45053	6.25923	6.05593	0.191299	1.14179	0.0811789	0.394603	1.31458	3.85901e-05	0.203304	1.15133	0.0101748	0.183557	0.000109461	0.0291296
CXCL5	4.09185	4.21904	4.53149	-0.127195	-1.09217	0.626724	-0.439642	-1.35627	0.0523714	-0.312448	-1.24181	0.0973179	0.751645	0.0777902	0.165301
CXCL8	3.95318	3.62007	2.95274	0.333108	1.25972	0.0896176	1.00044	2.00061	8.74918e-09	0.667328	1.58813	3.23131e-06	0.197604	6.09012e-08	3.18643e-05
DCN	3.47329	2.65017	2.31765	0.823123	1.76923	1.47592e-07	1.15564	2.22784	1.56288e-16	0.332521	1.25921	0.00270824	2.61977e-05	1.84941e-14	0.0101239
DCTPP1	3.31243	3.53786	2.84105	-0.22543	-1.16913	0.113232	0.471377	1.38643	0.000147307	0.696807	1.62091	4.72595e-11	0.237563	0.00035574	5.39931e-09
DDC	4.13564	4.42915	4.2049	-0.293514	-1.22562	0.113763	-0.0692629	-1.04918	0.665157	0.224251	1.16817	0.0929649	0.237563	0.726556	0.160988
DEFA1	1.25492	0.807939	0.508423	0.446978	1.36318	0.0091495	0.746494	1.67771	6.91087e-07	0.299516	1.23073	0.0150686	0.0328088	3.18618e-06	0.0384845
DIABLO	1.6265	1.36263	1.35778	0.263878	1.2007	0.183557	0.268726	1.20474	0.117183	0.00484829	1.00337	0.972852	0.330775	0.154646	0.975601
DKK3	5.07086	4.41501	4.25376	0.655848	1.57554	1.5887e-06	0.817099	1.76186	1.13586e-11	0.16125	1.11826	0.0950871	0.000112798	2.5202e-10	0.163072
DLK1	4.72985	4.00707	3.8444	0.722782	1.65036	0.000230173	0.885452	1.84734	2.39333e-07	0.16267	1.11936	0.244157	0.00220842	1.14815e-06	0.341243
DNAJB8	0.25371	0.204418	0.227547	0.0492916	1.03476	0.438263	0.0261621	1.0183	0.633827	-0.0231295	-1.01616	0.612873	0.580147	0.699905	0.695111
DOK2	1.81918	1.53916	1.68001	0.280017	1.21421	0.250459	0.139164	1.10127	0.508238	-0.140853	-1.10256	0.421166	0.398713	0.578283	0.515566
DPP4	3.69043	3.90475	3.88519	-0.214321	-1.16016	0.0154986	-0.19476	-1.14453	0.0109373	0.0195605	1.01365	0.757548	0.0504773	0.0186669	0.815803
DPP7	2.67552	2.80594	2.64927	-0.13042	-1.09461	0.34892	0.0262546	1.01836	0.827111	0.156675	1.11472	0.118083	0.495466	0.858551	0.192291
DPT	5.32508	4.65651	4.55322	0.668571	1.5895	8.40449e-05	0.771861	1.70747	1.94876e-07	0.10329	1.07422	0.392349	0.00124316	9.47685e-07	0.490437
DUOX2	0.0603524	0.0295642	-0.0137418	0.0307882	1.02157	0.731711	0.0740942	1.0527	0.339876	0.043306	1.03047	0.502549	0.819424	0.404886	0.60069
EDIL3	2.35822	2.21794	2.2018	0.140282	1.10212	0.137704	0.156418	1.11452	0.0556871	0.0161358	1.01125	0.811977	0.268599	0.0822531	0.860454
EFEMP1	4.95742	4.40528	4.21694	0.552145	1.46626	2.83609e-05	0.740481	1.67073	1.85182e-10	0.188337	1.13945	0.04461	0.000671207	2.19132e-09	0.0899805
EGFR	2.64505	2.83164	2.81885	-0.186594	-1.13807	0.000786204	-0.173803	-1.12803	0.000300843	0.0127903	1.00891	0.746647	0.00489654	0.000693501	0.813067
EIF4EBP1	4.64274	4.41113	3.7643	0.231609	1.17414	0.375785	0.87844	1.83839	0.000121424	0.646831	1.56573	0.000651759	0.521108	0.00030316	0.0031186
ENG	4.24948	4.22456	4.24293	0.0249221	1.01742	0.696325	0.00655731	1.00456	0.905375	-0.0183648	-1.01281	0.689183	0.799985	0.927952	0.769371
ENPP2	1.73065	1.55439	1.57791	0.176263	1.12995	0.126005	0.152742	1.11168	0.124869	-0.0235216	-1.01644	0.776037	0.253485	0.163573	0.829799
ENTPD5	3.0484	3.17746	3.0212	-0.129056	-1.09358	0.229079	0.0272094	1.01904	0.768879	0.156266	1.1144	0.0432914	0.380665	0.817221	0.0885251
ENTPD6	1.88601	1.84832	1.62756	0.0376919	1.02647	0.587853	0.258457	1.1962	2.24932e-05	0.220765	1.16535	1.38266e-05	0.712245	6.82485e-05	0.000116868
EPHB4	4.26761	3.79911	3.58201	0.468508	1.38368	0.000192635	0.6856	1.60837	6.12231e-10	0.217092	1.16239	0.0155691	0.00202285	6.39241e-09	0.0394789
EPHX2	0.396731	0.599391	0.392167	-0.20266	-1.15082	0.0403201	0.00456412	1.00317	0.957224	0.207224	1.15446	0.00366594	0.105247	0.959928	0.0127589
ESAM	1.83629	1.52684	1.38214	0.309447	1.23923	0.0076862	0.454146	1.36997	7.4886e-06	0.144698	1.1055	0.0819809	0.0293398	2.5562e-05	0.146247
F7	3.31978	3.50072	3.6335	-0.180941	-1.13362	0.0667931	-0.313717	-1.24291	0.000263935	-0.132776	-1.0964	0.0614188	0.16026	0.000616933	0.115363
F9	3.62607	3.71017	3.60007	-0.0840948	-1.06002	0.37497	0.0260085	1.01819	0.750649	0.110103	1.07931	0.106741	0.521108	0.802652	0.176247
FABP2	3.55654	3.14224	2.67522	0.414301	1.33265	0.102735	0.881318	1.84206	7.0668e-05	0.467017	1.38225	0.010776	0.222384	0.000187217	0.0300873
FABP4	4.30401	2.97105	2.71298	1.33297	2.5192	3.77932e-07	1.59103	3.01265	5.55613e-12	0.258068	1.19588	0.162942	4.4722e-05	1.40887e-10	0.246147
FABP6	1.56727	1.08166	0.960382	0.48561	1.40018	0.000856405	0.60689	1.52297	1.79057e-06	0.12128	1.0877	0.243056	0.00506706	7.34459e-06	0.341047
FADD	1.90089	1.82261	1.52935	0.078277	1.05576	0.630205	0.371537	1.29373	0.00852985	0.29326	1.22541	0.0125621	0.753275	0.0148436	0.0327907
FAM3C	6.04312	5.23834	4.96868	0.804783	1.74688	0.000177148	1.07443	2.1059	1.1635e-08	0.269652	1.20552	0.0778654	0.00202285	7.6489e-08	0.139607
FAP	0.331562	0.360188	0.405505	-0.0286262	-1.02004	0.689441	-0.0739432	-1.05259	0.23266	-0.045317	-1.03191	0.379217	0.799985	0.286786	0.479083
FAS	6.30928	5.96305	5.80131	0.346227	1.27123	0.00310376	0.507966	1.42204	7.19505e-07	0.161739	1.11863	0.0536947	0.0144307	3.27467e-06	0.105313
FBP1	2.61344	3.02962	2.04168	-0.41618	-1.33439	0.08745	0.571761	1.48634	0.0067753	0.987941	1.98335	3.51262e-08	0.19525	0.0119071	7.33518e-07
FCGR2A	4.62524	4.67273	4.42239	-0.0474825	-1.03346	0.726745	0.202855	1.15097	0.0847087	0.250338	1.18949	0.0108109	0.816438	0.118392	0.0300873
FCGR3B	1.8881	1.97413	1.85942	-0.0860331	-1.06145	0.463793	0.0286753	1.02008	0.77737	0.114708	1.08276	0.174786	0.6031	0.82378	0.259619
FCN2	4.90587	5.23418	5.30995	-0.328309	-1.25554	0.0140669	-0.404086	-1.32325	0.000500297	-0.075777	-1.05393	0.428503	0.0462384	0.0010896	0.520954
FCRL1	3.32948	3.37887	3.46422	-0.049391	-1.03483	0.690418	-0.134747	-1.0979	0.20903	-0.0853558	-1.06095	0.338749	0.799985	0.26037	0.435225
FETUB	3.47488	4.05878	4.44492	-0.583899	-1.49889	5.75503e-05	-0.970039	-1.95889	7.4555e-14	-0.38614	-1.30689	0.000209593	0.000928652	4.41117e-12	0.00117208
FGFR1OP	1.23616	1.24139	0.941752	-0.00523301	-1.00363	0.966531	0.294408	1.22638	0.00661369	0.299641	1.23084	0.000929668	0.988814	0.0116809	0.0041254
FUCA1	4.19877	4.39219	4.26239	-0.193424	-1.14347	0.230544	-0.0636282	-1.04509	0.647682	0.129796	1.09414	0.263107	0.380665	0.711849	0.357865
GAS6	7.38196	7.24249	7.05419	0.139471	1.1015	0.136252	0.327771	1.25507	6.16577e-05	0.1883	1.13942	0.00535961	0.268599	0.000164575	0.0173099
GDF15	4.65975	4.13913	3.33173	0.52062	1.43457	0.0318497	1.32802	2.51058	7.17516e-10	0.807398	1.75005	4.95427e-06	0.0890288	7.07551e-09	4.62833e-05
GDF2	2.78938	2.87176	2.91009	-0.0823781	-1.05876	0.394099	-0.120716	-1.08727	0.148778	-0.0383382	-1.02693	0.581108	0.538096	0.19276	0.669494
GGH	2.74376	3.18453	3.19832	-0.440773	-1.35733	0.000451589	-0.454558	-1.37036	3.05093e-05	-0.0137845	-1.0096	0.877503	0.00341094	8.87772e-05	0.908202
GH1	4.30326	3.89863	4.28465	0.404627	1.32375	0.257512	0.0186095	1.01298	0.951884	-0.386017	-1.30678	0.133339	0.40811	0.957277	0.209448
GHRL	3.56016	2.56969	2.62782	0.990465	1.98682	0.000194057	0.932341	1.90837	5.08222e-05	-0.0581233	-1.04111	0.758352	0.00202285	0.000136681	0.815803
GLO1	6.52456	6.53677	6.0401	-0.0122136	-1.0085	0.956342	0.484457	1.39906	0.0124044	0.496671	1.41095	0.0021274	0.986022	0.0209693	0.00827067
GLRX	4.03624	3.74908	3.31103	0.28716	1.22024	0.157681	0.72521	1.65314	4.50168e-05	0.438051	1.35477	0.00287906	0.29934	0.000122931	0.0105368
GP1BA	4.52504	4.3174	4.35641	0.207641	1.1548	0.0365088	0.168636	1.124	0.0492202	-0.0390051	-1.02741	0.583577	0.098936	0.0740815	0.669494
GP2	4.26638	3.33988	2.68997	0.926498	1.90066	0.00030723	1.57641	2.98227	5.07546e-12	0.649914	1.56907	0.000427172	0.00259683	1.38599e-10	0.00210619
GPNMB	3.42712	3.30071	3.26053	0.126413	1.09158	0.202393	0.16659	1.1224	0.0522565	0.0401768	1.02824	0.572717	0.348784	0.0777902	0.666804
GPR37	4.76704	3.86659	3.18456	0.900449	1.86665	0.000423294	1.58248	2.99484	3.48412e-12	0.68203	1.6044	0.000207959	0.00333932	1.03072e-10	0.00117208
GRAP2	2.61173	2.25595	2.49535	0.355784	1.27968	0.239137	0.116387	1.08402	0.655482	-0.239397	-1.1805	0.270592	0.387642	0.718197	0.364537
GRK5	0.324952	0.410107	0.429323	-0.0851551	-1.0608	0.298428	-0.104371	-1.07503	0.140528	-0.019216	-1.01341	0.743982	0.448764	0.18341	0.812657
GSTA1	4.59164	5.30832	4.7388	-0.716683	-1.6434	0.0196959	-0.147164	-1.10739	0.577765	0.56952	1.48403	0.0100311	0.0624288	0.642968	0.0289516
GUSB	2.45617	2.63581	2.32206	-0.179637	-1.1326	0.230405	0.134109	1.09741	0.299887	0.313746	1.24293	0.00377569	0.380665	0.362108	0.0128882
GYS1	2.44414	2.48675	2.30085	-0.0426156	-1.02998	0.819408	0.143292	1.10442	0.374533	0.185907	1.13753	0.166673	0.88531	0.441725	0.249658
GZMH	2.67041	2.72132	2.47922	-0.0509114	-1.03592	0.762627	0.191194	1.14171	0.189817	0.242105	1.18272	0.0464733	0.838181	0.238955	0.0931597
HEBP1	-0.207914	-0.14811	-0.348558	-0.0598038	-1.04232	0.534883	0.140643	1.1024	0.091831	0.200447	1.14905	0.00405549	0.666258	0.126848	0.0135821
HK2	0.491767	0.523879	0.481597	-0.0321124	-1.02251	0.547541	0.0101692	1.00707	0.825469	0.0422817	1.02974	0.271092	0.67492	0.858551	0.364537
HMOX1	6.34528	6.17429	5.78427	0.170984	1.12583	0.345207	0.56101	1.4753	0.000385118	0.390027	1.31042	0.00293269	0.492163	0.000859855	0.0106235
HNRNPK	0.871493	0.894436	0.692321	-0.022943	-1.01603	0.82047	0.179171	1.13223	0.0409179	0.202114	1.15038	0.00572939	0.88531	0.0634803	0.0181601
HSPB1	6.08285	5.72187	5.62435	0.360974	1.28429	0.175153	0.458498	1.37411	0.0466085	0.0975242	1.06994	0.609986	0.319685	0.0707095	0.694054
HSPG2	4.33741	3.55311	3.37277	0.784295	1.72225	2.54525e-05	0.964641	1.95158	3.45e-09	0.180346	1.13316	0.172416	0.000664399	2.6625e-08	0.257175
HYAL1	1.43373	1.40862	1.40295	0.0251169	1.01756	0.682565	0.0307818	1.02157	0.561877	0.00566489	1.00393	0.897917	0.799704	0.631992	0.913646
HYOU1	3.50214	3.23222	3.14204	0.269922	1.20574	0.0069977	0.3601	1.28351	3.61628e-05	0.090178	1.0645	0.208028	0.027002	0.000104372	0.301429
ICAM1	6.27621	6.31403	6.15667	-0.0378197	-1.02656	0.693205	0.11954	1.08639	0.149573	0.15736	1.11524	0.0230055	0.799985	0.193085	0.0548118
ICAM2	2.99607	2.91196	2.72919	0.0841186	1.06004	0.334752	0.266879	1.2032	0.000450018	0.182761	1.13505	0.0037731	0.483077	0.000986152	0.0128882
ICAM3	4.00185	3.97757	3.91678	0.0242745	1.01697	0.749954	0.085067	1.06074	0.196684	0.0607925	1.04304	0.267448	0.83198	0.246724	0.362382
ICAM5	2.02567	1.69206	1.57838	0.33361	1.26016	0.00366492	0.447293	1.36348	7.96226e-06	0.113683	1.08199	0.166203	0.0158664	2.692e-05	0.249658
IGFBP1	7.61477	6.26321	4.98056	1.35155	2.55187	0.000203474	2.63421	6.20835	9.88525e-16	1.28266	2.43287	1.15945e-06	0.00202285	8.77316e-14	1.47001e-05
IGFBP2	7.67242	6.86348	6.38268	0.808943	1.75193	0.000299441	1.28975	2.44485	7.50747e-11	0.480803	1.39552	0.00270921	0.00259649	1.06606e-09	0.0101239
IGFBP3	3.77305	3.82092	4.43798	-0.0478742	-1.03374	0.781539	-0.66493	-1.58549	1.14629e-05	-0.617056	-1.53374	1.0955e-06	0.855343	3.76789e-05	1.44038e-05
IGFBP6	5.6074	4.81215	4.70528	0.795253	1.73538	1.19128e-05	0.902127	1.86882	1.29478e-08	0.106874	1.07689	0.405879	0.000395583	8.20795e-08	0.503801
IGFBP7	2.54839	2.06397	1.90485	0.484411	1.39901	0.000108147	0.643532	1.56215	4.70149e-09	0.159121	1.11661	0.074084	0.00145832	3.33806e-08	0.135566
IGFBPL1	1.8882	1.39348	1.16122	0.494724	1.40905	0.000101694	0.726987	1.65518	1.02136e-10	0.232263	1.17468	0.0105956	0.00144406	1.3429e-09	0.0300873
IGSF8	2.3878	2.01328	1.79079	0.374529	1.29642	0.0123864	0.59701	1.51258	5.14578e-06	0.222481	1.16674	0.0385005	0.0428823	1.90287e-05	0.0808738
IL18BP	2.39377	2.18499	1.83795	0.208774	1.15571	0.0769312	0.555816	1.47	9.48797e-08	0.347042	1.27195	5.25095e-05	0.175838	5.02721e-07	0.000345811
IL19	3.24467	1.9169	1.92326	1.32778	2.51016	2.84733e-08	1.32142	2.49912	2.25061e-10	-0.0063606	-1.00442	0.969733	1.0108e-05	2.57732e-09	0.975227
IL1RL1	3.68381	3.38367	2.34121	0.300142	1.23127	0.132292	1.3426	2.53608	9.24618e-14	1.04246	2.05973	2.73317e-12	0.263841	4.68914e-12	4.85138e-10
IL6ST	2.89518	2.79363	2.63266	0.101546	1.07292	0.23339	0.262521	1.19957	0.000410489	0.160975	1.11804	0.00891302	0.381812	0.000905115	0.0263677
