# Supplementary material for: Metabolomic analysis of honey bee ( Apis mellifera L.) response to glyphosate exposure
Source: Royal Society of Chemistry journal article supplement (doi:10.1039/d2mo00046f), 2022-05-03
Supplement: d2mo00046f4.xlsx [file d2mo00046f4.xlsx]

## Sheet: REU_Analysis_Cardiometabolic.co
marker	Mean_Estimate_Deceased	Mean_Estimate_Intubated	Mean_Estimate_NonSevere	lgFCH_Deceased_vs_Intubated	FCH_Deceased_vs_Intubated	p_Deceased_vs_Intubated	lgFCH_Deceased_vs_NonSevere	FCH_Deceased_vs_NonSevere	p_Deceased_vs_NonSevere	lgFCH_Intubated_vs_NonSevere	FCH_Intubated_vs_NonSevere	p_Intubated_vs_NonSevere	FDR_Deceased_vs_Intubated	FDR_Deceased_vs_NonSevere	FDR_Intubated_vs_NonSevere
RNASE3	4.10737	2.36001	1.88123	1.74737	3.35745	0.0134055	2.22614	4.67879	0.000492288	0.478772	1.39356	0.271761	0.575002	0.0873812	0.591326
ICAM3	4.49466	3.68829	3.67158	0.80637	1.74881	0.00168124	0.823079	1.76918	0.000338233	0.0167093	1.01165	0.914487	0.344394	0.0873812	0.975689
SIGLEC7	3.18786	2.66043	2.44997	0.527426	1.44136	0.0430452	0.737892	1.66774	0.00172012	0.210466	1.15706	0.194089	0.617958	0.152661	0.534516
TSPAN1	1.16166	0.191375	0.287324	0.970282	1.95922	0.00194025	0.874334	1.83316	0.0016312	-0.0959486	-1.06877	0.613779	0.344394	0.152661	0.800636
TINAGL1	3.93917	3.57644	3.34677	0.362728	1.28585	0.107595	0.592397	1.50775	0.00362541	0.229669	1.17257	0.104129	0.617958	0.161117	0.439793
VWF	6.16414	5.57469	5.21858	0.589455	1.50468	0.0961212	0.945566	1.92594	0.00313822	0.356111	1.27997	0.108533	0.617958	0.161117	0.439793
ACY1	4.47601	3.75224	3.05109	0.723771	1.65149	0.181703	1.42492	2.685	0.00369572	0.701149	1.6258	0.0406193	0.668074	0.161117	0.360161
CTSL	5.25454	4.75643	4.31467	0.498118	1.41237	0.168188	0.939874	1.91836	0.00405786	0.441756	1.35826	0.0526719	0.668074	0.161117	0.38145
GPNMB	4.63906	3.84917	3.79204	0.789888	1.72894	0.0167644	0.847021	1.79878	0.00408465	0.0571324	1.0404	0.778475	0.575002	0.161117	0.900715
FCN2	4.3646	5.18379	5.29088	-0.819194	-1.76442	0.032957	-0.926284	-1.90037	0.00697729	-0.10709	-1.07705	0.65175	0.617958	0.225176	0.818392
IGFBP3	3.49099	4.5382	4.48798	-1.04721	-2.06654	0.0116901	-0.996992	-1.99584	0.00689222	0.0502218	1.03542	0.843772	0.575002	0.225176	0.93197
AZU1	3.25636	2.84607	1.94001	0.410282	1.32895	0.452487	1.31635	2.49036	0.00775491	0.90607	1.87393	0.00952942	0.873004	0.229416	0.23881
LEPR	0.751671	0.534419	0.304545	0.217253	1.16252	0.260951	0.447126	1.36332	0.0102866	0.229873	1.17273	0.059687	0.758274	0.244724	0.392387
DCTPP1	3.22891	2.59221	2.40035	0.636702	1.55477	0.0754629	0.828569	1.77592	0.00983768	0.191867	1.14224	0.388903	0.617958	0.244724	0.674259
FETUB	3.04404	3.82061	4.00223	-0.77657	-1.71305	0.0629039	-0.958192	-1.94287	0.0103404	-0.181622	-1.13416	0.483344	0.617958	0.244724	0.723997
RARRES2	2.02211	2.61286	2.70133	-0.590742	-1.50602	0.0488133	-0.679217	-1.60127	0.0112107	-0.0884747	-1.06325	0.633653	0.617958	0.24641	0.812082
TNNI3	1.98723	2.29626	0.690162	-0.309028	-1.23887	0.587662	1.29707	2.45729	0.0117999	1.60609	3.04427	2.30609e-05	0.877537	0.24641	0.00272887
LILRB5	7.01196	6.18363	6.04312	0.828326	1.77562	0.072351	0.968834	1.95726	0.0185318	0.140508	1.10229	0.623287	0.617958	0.258934	0.807543
PDGFRA	2.54566	1.84818	1.79264	0.697476	1.62167	0.04384	0.753017	1.68531	0.0146215	0.0555413	1.03925	0.795219	0.617958	0.258934	0.913601
PDGFRB	3.33687	2.94476	2.82804	0.392115	1.31232	0.112878	0.508828	1.42289	0.0213678	0.116713	1.08426	0.448586	0.617958	0.258934	0.710929
PLAT	4.80481	4.08619	3.85265	0.718627	1.64561	0.110173	0.952165	1.93477	0.0180001	0.233538	1.17572	0.40462	0.617958	0.258934	0.677547
PLXNB2	5.51401	5.24123	5.12959	0.272783	1.20814	0.145435	0.384422	1.30534	0.0218817	0.111639	1.08045	0.339866	0.633352	0.258934	0.639612
ADA2	5.84387	5.16046	5.17004	0.683409	1.60593	0.0349704	0.673831	1.5953	0.0192986	-0.0095775	-1.00666	0.961829	0.617958	0.258934	0.984656
BLMH	2.79539	2.29336	2.17852	0.502029	1.4162	0.0796958	0.616862	1.53354	0.0159866	0.114833	1.08285	0.518764	0.617958	0.258934	0.757117
CD163	4.27949	3.65782	3.38855	0.621667	1.53865	0.148079	0.89094	1.85438	0.0206111	0.269273	1.2052	0.315793	0.633352	0.258934	0.629813
CD97	4.68956	4.35558	4.06056	0.333976	1.26048	0.264835	0.628994	1.54649	0.0193949	0.295018	1.2269	0.117573	0.758274	0.258934	0.441771
CNST	0.898257	2.37989	2.45391	-1.48164	-2.79265	0.0476191	-1.55565	-2.93967	0.0194745	-0.0740153	-1.05264	0.872923	0.617958	0.258934	0.950575
GAS6	7.60253	6.95938	6.98686	0.643147	1.56173	0.0276285	0.615665	1.53226	0.0175697	-0.0274824	-1.01923	0.878702	0.617958	0.258934	0.953942
GP2	4.63816	3.50564	3.06702	1.13252	2.19241	0.121049	1.57114	2.97138	0.0163343	0.438616	1.3553	0.335685	0.617958	0.258934	0.639612
IL1RL1	3.89159	3.25938	2.67266	0.632204	1.54993	0.283523	1.21892	2.32773	0.0213087	0.586718	1.50183	0.113954	0.762505	0.258934	0.439793
SNAP23	2.53249	4.0538	4.07664	-1.52131	-2.87052	0.046954	-1.54415	-2.91633	0.0233313	-0.0228382	-1.01596	0.961542	0.617958	0.267181	0.984656
PTN	1.4927	0.353956	0.0918127	1.13874	2.20189	0.113969	1.40089	2.64064	0.0293208	0.262144	1.19926	0.558733	0.617958	0.299322	0.777844
USP8	1.04899	2.13618	1.90535	-1.08719	-2.1246	0.0153229	-0.856367	-1.81047	0.0303538	0.230822	1.1735	0.403285	0.575002	0.299322	0.677547
CDH2	2.31497	2.17344	1.81324	0.141534	1.10308	0.576051	0.501733	1.41591	0.0274988	0.360199	1.2836	0.0254327	0.877537	0.299322	0.360161
CHIT1	3.59556	5.45664	5.43164	-1.86109	-3.63281	0.0484003	-1.83608	-3.5704	0.0283617	0.0250019	1.01748	0.965811	0.617958	0.299322	0.984656
GGH	2.11841	2.49958	2.68425	-0.381161	-1.30239	0.191492	-0.565833	-1.48024	0.0301869	-0.184672	-1.13656	0.311562	0.668074	0.299322	0.628096
NOTCH1	6.01623	5.74814	5.6864	0.268091	1.20421	0.124772	0.329832	1.25687	0.0342262	0.0617411	1.04372	0.570122	0.617958	0.328387	0.778435
SEMA7A	4.67807	4.47942	4.23685	0.198646	1.14762	0.402931	0.441222	1.35775	0.0382098	0.242576	1.1831	0.105453	0.850391	0.35696	0.439793
SDC1	4.31547	3.45643	3.08263	0.85904	1.81383	0.199405	1.23284	2.3503	0.039257	0.373802	1.29576	0.371645	0.687271	0.357339	0.663963
MARCO	4.93877	4.41812	4.32141	0.520653	1.4346	0.125332	0.617357	1.53406	0.0413651	0.0967042	1.06933	0.647331	0.617958	0.358162	0.817819
FAP	1.04944	0.769975	0.658127	0.279468	1.21375	0.191954	0.391316	1.31159	0.0407604	0.111848	1.08061	0.403185	0.668074	0.358162	0.677547
CA13	0.861043	2.19449	1.83915	-1.33344	-2.52004	0.0159028	-0.978104	-1.96988	0.0445095	0.35534	1.27929	0.297604	0.575002	0.376211	0.61424
ITGB1BP2	1.34899	2.60062	2.46631	-1.25163	-2.38111	0.0490653	-1.11732	-2.16944	0.0473118	0.13431	1.09757	0.732946	0.617958	0.390598	0.876081
PCDH17	1.89621	1.52168	1.39689	0.374533	1.29642	0.187415	0.499322	1.41355	0.0487992	0.124789	1.09035	0.481639	0.668074	0.393721	0.723997
TCN2	7.31826	7.24313	6.94151	0.0751259	1.05345	0.730909	0.376746	1.29841	0.0543227	0.30162	1.23253	0.0300752	0.89695	0.419365	0.360161
ALCAM	2.40483	1.99758	1.98846	0.407254	1.32616	0.0945828	0.416369	1.33456	0.0543402	0.009115	1.00634	0.951952	0.617958	0.419365	0.984656
DPP4	4.1592	3.78501	3.77869	0.374194	1.29612	0.10308	0.380507	1.3018	0.0619531	0.00631352	1.00439	0.964687	0.617958	0.458195	0.984656
FBP1	1.81594	1.50097	1.05057	0.314974	1.24399	0.490602	0.765374	1.69981	0.0611518	0.4504	1.36642	0.118221	0.877537	0.458195	0.441771
CEACAM8	3.82611	3.38741	2.9219	0.438708	1.35539	0.42071	0.904218	1.87153	0.0633832	0.46551	1.38081	0.174588	0.850391	0.459205	0.508022
RCOR1	0.622971	0.53885	0.408675	0.0841214	1.06004	0.516634	0.214297	1.16014	0.0647486	0.130175	1.09443	0.111873	0.877537	0.459715	0.439793
FABP4	4.14153	4.57951	3.04981	-0.437978	-1.3547	0.51625	1.09172	2.13128	0.070338	1.5297	2.88725	0.000508032	0.877537	0.489607	0.0300586
IL6ST	3.2176	2.92135	2.83081	0.29625	1.22795	0.221825	0.386791	1.30748	0.0733176	0.0905409	1.06477	0.549869	0.729148	0.500533	0.769789
VCAM1	4.13897	3.56245	3.61093	0.576521	1.49125	0.0929582	0.528037	1.44197	0.0824833	-0.0484845	-1.03418	0.820024	0.617958	0.507107	0.928611
WASF1	0.281657	0.868181	0.746822	-0.586524	-1.50162	0.0645807	-0.465165	-1.38047	0.097136	0.121359	1.08776	0.537661	0.617958	0.507107	0.769397
LILRB1	4.17009	3.60823	3.76207	0.561861	1.47617	0.041421	0.408013	1.32686	0.0929832	-0.153848	-1.11253	0.367607	0.617958	0.507107	0.662439
MB	5.73337	6.89066	4.7056	-1.15729	-2.23038	0.0807541	1.02777	2.03887	0.0799064	2.18506	4.54746	9.87565e-07	0.617958	0.507107	0.000350585
PCOLCE	4.53033	5.25624	5.1618	-0.725909	-1.65394	0.072963	-0.631473	-1.54915	0.0780602	0.0944357	1.06765	0.706904	0.617958	0.507107	0.865348
PEAR1	1.48941	1.34149	1.21547	0.147921	1.10797	0.409873	0.273942	1.20911	0.0871728	0.126021	1.09128	0.263572	0.850391	0.507107	0.591326
PRTN3	3.18456	3.14947	2.53909	0.0350821	1.02462	0.935704	0.645464	1.56424	0.0967898	0.610382	1.52666	0.0275994	0.97412	0.507107	0.360161
ACAN	2.90433	2.54779	2.47677	0.356541	1.28035	0.204222	0.427559	1.34496	0.0869576	0.0710184	1.05046	0.685165	0.697105	0.507107	0.84456
ANGPTL3	4.03567	5.00773	4.52889	-0.97206	-1.96164	0.0042411	-0.493218	-1.40758	0.095165	0.478842	1.39362	0.0231703	0.501864	0.507107	0.360161
CXCL5	3.508	4.48268	4.47815	-0.974681	-1.96521	0.132682	-0.970151	-1.95905	0.0916555	0.00453034	1.00315	0.991036	0.62803	0.507107	0.997894
CXCL8	3.95437	3.25952	2.86264	0.694853	1.61872	0.336408	1.09173	2.1313	0.0901864	0.396881	1.31666	0.380799	0.823401	0.507107	0.669227
DEFA1	1.58216	1.24523	0.826796	0.336926	1.26306	0.48858	0.755361	1.68805	0.0821349	0.418435	1.33648	0.171988	0.877537	0.507107	0.508022
DKK3	4.74896	4.15878	4.18892	0.590182	1.50544	0.110261	0.560039	1.47431	0.0874165	-0.0301432	-1.02111	0.895582	0.617958	0.507107	0.96343
GRAP2	1.49416	2.59459	2.57738	-1.10044	-2.1442	0.110631	-1.08323	-2.11877	0.0767477	0.0172101	1.012	0.967976	0.617958	0.507107	0.984656
HSPB1	4.45216	5.42044	5.38487	-0.96828	-1.95651	0.111853	-0.932708	-1.90886	0.0842018	0.035572	1.02496	0.925126	0.617958	0.507107	0.97744
IGFBP1	7.19401	7.70244	5.88697	-0.508429	-1.4225	0.561777	1.30704	2.47434	0.094822	1.81547	3.51975	0.00139175	0.877537	0.507107	0.0494071
LRMP	0.907257	1.49176	1.42557	-0.584505	-1.49952	0.100591	-0.51831	-1.43228	0.100137	0.0661952	1.04695	0.764723	0.617958	0.508896	0.893016
MSTN	0.618071	0.948594	1.10279	-0.330522	-1.25747	0.318318	-0.484721	-1.39932	0.100346	-0.154199	-1.1128	0.456964	0.812971	0.508896	0.717797
COL4A1	4.75396	4.20887	4.15845	0.545082	1.4591	0.184488	0.595512	1.51101	0.102626	0.0504295	1.03557	0.843818	0.668074	0.513129	0.93197
ACP5	4.40573	3.6284	3.94148	0.777329	1.71395	0.0194367	0.464245	1.3796	0.111421	-0.313084	-1.24236	0.129054	0.575002	0.54184	0.453071
ACTA2	0.998214	1.0937	0.396384	-0.0954857	-1.06843	0.821491	0.601831	1.51764	0.111265	0.697316	1.62149	0.0101357	0.949933	0.54184	0.23881
ICAM2	2.98567	2.73102	2.63722	0.254653	1.19305	0.30412	0.348448	1.27319	0.11406	0.0937951	1.06717	0.545004	0.794671	0.547181	0.769397
STK4	0.0617857	0.436525	0.347029	-0.374739	-1.29661	0.068264	-0.285243	-1.21862	0.116015	0.0894959	1.064	0.483089	0.617958	0.549139	0.723997
THOP1	5.14531	4.80026	4.67056	0.345052	1.2702	0.314127	0.474751	1.38968	0.119573	0.129699	1.09407	0.545212	0.812971	0.558534	0.769397
CLEC5A	3.36081	2.89122	2.76704	0.469589	1.38472	0.279814	0.593778	1.50919	0.124297	0.124189	1.08989	0.647344	0.758274	0.565708	0.817819
ICAM1	6.65961	6.13799	6.29395	0.521627	1.43557	0.0532521	0.365663	1.28847	0.124248	-0.155963	-1.11417	0.351874	0.617958	0.565708	0.64837
SORT1	4.45944	4.40587	4.13755	0.0535741	1.03783	0.826965	0.321894	1.24997	0.140852	0.26832	1.2044	0.0837296	0.951436	0.567004	0.439402
SOST	5.07999	4.70486	4.64498	0.375123	1.29695	0.277923	0.435006	1.35192	0.156525	0.0598825	1.04238	0.781513	0.758274	0.567004	0.90077
LILRA5	4.66286	4.24887	4.24846	0.413988	1.33236	0.188895	0.414397	1.33274	0.138135	0.00040875	1.00028	0.998339	0.668074	0.567004	0.998339
MSMB	1.35173	1.27968	0.78216	0.0720473	1.05121	0.863854	0.569569	1.48408	0.128743	0.497521	1.41179	0.0618704	0.95908	0.567004	0.399345
NPTXR	2.8236	2.58519	2.40732	0.238412	1.17969	0.469158	0.416282	1.33448	0.15558	0.177869	1.13121	0.389273	0.876584	0.567004	0.674259
PROC	2.86397	3.46719	3.24175	-0.603216	-1.5191	0.0386902	-0.377776	-1.29934	0.140866	0.22544	1.16913	0.213459	0.617958	0.567004	0.553123
AOC3	2.12409	2.05627	1.79117	0.0678107	1.04812	0.785685	0.332917	1.25956	0.134499	0.265106	1.20172	0.0928814	0.931761	0.567004	0.439793
CASP3	2.00776	3.01446	2.72006	-1.0067	-2.00931	0.0674202	-0.712301	-1.63842	0.14233	0.294398	1.22637	0.389361	0.617958	0.567004	0.674259
CD69	3.76586	4.85604	4.65981	-1.09019	-2.12902	0.121671	-0.893948	-1.85825	0.151328	0.196238	1.14571	0.654309	0.617958	0.567004	0.818392
CDH5	2.24921	2.17015	1.97763	0.0790643	1.05633	0.706094	0.271585	1.20713	0.146186	0.192521	1.14276	0.145591	0.89695	0.567004	0.483037
CDH6	2.05413	1.62829	1.57067	0.425835	1.34335	0.257625	0.483459	1.39809	0.147798	0.0576247	1.04075	0.806149	0.758274	0.567004	0.92097
DCN	3.0255	2.72061	2.55618	0.304887	1.23532	0.398154	0.469316	1.38445	0.143826	0.164429	1.12072	0.466962	0.850391	0.567004	0.723997
DIABLO	0.736286	1.3508	1.33361	-0.614514	-1.53104	0.187798	-0.59732	-1.5129	0.148729	0.0171945	1.01199	0.952841	0.668074	0.567004	0.984656
ENG	4.67964	4.55321	4.42191	0.126437	1.09159	0.509061	0.257736	1.1956	0.130901	0.131299	1.09528	0.275194	0.877537	0.567004	0.592084
ENPP2	2.07653	1.86838	1.73859	0.208147	1.1552	0.413635	0.337943	1.26395	0.135953	0.129796	1.09414	0.416034	0.850391	0.567004	0.689148
ENTPD5	2.0768	2.28584	2.43481	-0.209037	-1.15592	0.460912	-0.358005	-1.28165	0.155901	-0.148968	-1.10878	0.402104	0.876584	0.567004	0.677547
FABP6	1.89763	2.46138	1.15035	-0.563753	-1.47811	0.336785	0.747278	1.67862	0.152045	1.31103	2.48119	0.000593816	0.823401	0.567004	0.030115
FCGR3B	2.35334	2.1172	1.95852	0.236143	1.17784	0.426916	0.394819	1.31478	0.135701	0.158676	1.11626	0.394529	0.854737	0.567004	0.676608
HEBP1	-0.0962857	-0.115812	-0.394295	0.0195268	1.01363	0.929107	0.298009	1.22945	0.128148	0.278482	1.21292	0.0457906	0.973953	0.567004	0.367485
IGFBP7	2.77074	2.72216	2.30278	0.0485804	1.03425	0.889436	0.467963	1.38316	0.133381	0.419382	1.33736	0.0585115	0.962262	0.567004	0.391917
TFPI	4.95347	4.95718	4.63905	-0.00370357	-1.00257	0.988258	0.314421	1.24351	0.161028	0.318124	1.24671	0.0465826	0.993857	0.572435	0.367485
MEGF9	4.77181	4.6251	4.5548	0.146714	1.10705	0.400933	0.217016	1.16233	0.162366	0.0703018	1.04994	0.520385	0.850391	0.572435	0.757117
ANG	6.67814	7.1224	7.03196	-0.444257	-1.36061	0.121307	-0.353815	-1.27794	0.162862	0.0904418	1.0647	0.612267	0.617958	0.572435	0.800636
APOM	2.98539	3.71868	3.4959	-0.733289	-1.66243	0.0801071	-0.510516	-1.42456	0.167206	0.222773	1.16697	0.392604	0.617958	0.581943	0.676575
ENTPD6	1.6702	1.48991	1.45577	0.180287	1.13311	0.304437	0.214433	1.16025	0.16899	0.0341452	1.02395	0.755571	0.794671	0.58244	0.891122
CLC	1.781	1.55329	1.33071	0.227712	1.17098	0.539035	0.450291	1.36632	0.172296	0.222578	1.16682	0.338979	0.877537	0.582524	0.639612
GDF15	4.47366	4.32346	3.73045	0.150201	1.10972	0.805435	0.743203	1.67389	0.171317	0.593002	1.50838	0.123683	0.93441	0.582524	0.445742
MTPN	-0.00601429	0.121769	0.0931618	-0.127783	-1.09261	0.12326	-0.0991761	-1.07116	0.175967	0.0286069	1.02003	0.579367	0.617958	0.588007	0.78502
ADGRG2	3.65661	3.53302	3.28663	0.123589	1.08944	0.68928	0.36998	1.29233	0.178887	0.24639	1.18624	0.205669	0.89695	0.588007	0.543228
DUOX2	0.271357	-0.00720625	0.03098	0.278563	1.21299	0.167586	0.240377	1.1813	0.178571	-0.0381862	-1.02682	0.761395	0.668074	0.588007	0.893016
PPIB	0.181671	1.09044	0.614084	-0.908766	-1.87744	0.0151454	-0.432412	-1.34949	0.185662	0.476354	1.39122	0.0410419	0.575002	0.599181	0.360161
FADD	1.07219	1.85958	1.48108	-0.787396	-1.72596	0.0253135	-0.408894	-1.32767	0.184833	0.378501	1.29999	0.0841672	0.617958	0.599181	0.439402
CTSD	2.27199	2.02829	1.97801	0.243692	1.18402	0.332472	0.293975	1.22601	0.187938	0.0502828	1.03547	0.749021	0.823401	0.601063	0.886342
KITLG	2.4268	3.14763	2.87715	-0.720831	-1.64813	0.0667713	-0.450353	-1.36637	0.193375	0.270479	1.20621	0.268999	0.617958	0.602175	0.591326
MEP1B	1.06676	0.651444	0.622242	0.415313	1.33359	0.278933	0.444515	1.36086	0.191458	0.0292019	1.02045	0.902956	0.758274	0.602175	0.968427
CDH17	0.915186	0.739363	0.458655	0.175823	1.12961	0.655016	0.456531	1.37224	0.192402	0.280708	1.21479	0.256832	0.894349	0.602175	0.591326
LDLR	2.98714	2.76251	2.58392	0.224637	1.16848	0.524054	0.403219	1.32246	0.198441	0.178583	1.13177	0.419444	0.877537	0.609377	0.689148
DOK2	1.02849	1.88574	1.67244	-0.857258	-1.81159	0.130907	-0.643951	-1.5626	0.19912	0.213307	1.15934	0.546163	0.628002	0.609377	0.769397
CA3	6.5553	7.45702	5.8488	-0.901725	-1.8683	0.151883	0.706502	1.63184	0.2042	1.60823	3.04877	9.69206e-05	0.641887	0.619581	0.0086017
TYRO3	2.8034	2.70857	2.55662	0.0948312	1.06794	0.666063	0.246784	1.18656	0.206864	0.151952	1.11107	0.271577	0.89695	0.621327	0.591326
LTBP2	5.24084	4.89273	4.70948	0.348112	1.27289	0.46554	0.531361	1.44529	0.210026	0.183249	1.13544	0.53975	0.876584	0.621327	0.769397
FUCA1	4.32977	3.84211	3.84296	0.487665	1.40217	0.265528	0.48681	1.40134	0.209944	-0.000855568	-1.00059	0.997503	0.758274	0.621327	0.998339
PLTP	3.59079	3.4237	3.23754	0.167086	1.12279	0.600206	0.353246	1.27743	0.212803	0.18616	1.13773	0.352494	0.884408	0.624341	0.64837
CBLIF	2.26544	2.15685	1.68221	0.108593	1.07818	0.837072	0.58323	1.4982	0.214626	0.474637	1.38957	0.154326	0.951436	0.624527	0.489157
FCGR2A	5.24103	4.8035	4.83773	0.437529	1.35428	0.243045	0.403301	1.32253	0.224478	-0.0342273	-1.02401	0.88364	0.75685	0.647883	0.956379
DDC	4.67204	4.92491	4.11883	-0.252863	-1.19157	0.622987	0.55321	1.46735	0.226431	0.806074	1.74845	0.0142048	0.884408	0.648249	0.280149
OSMR	0.888614	0.796663	0.731393	0.0919518	1.06581	0.5345	0.157222	1.11514	0.232033	0.0652698	1.04628	0.481952	0.877537	0.658974	0.723997
TFRC	1.72956	2.28194	2.1145	-0.55238	-1.4665	0.137083	-0.384946	-1.30581	0.24068	0.167434	1.12306	0.469646	0.633352	0.662573	0.723997
TSHB	2.68454	2.43924	2.0844	0.245299	1.18534	0.671125	0.600141	1.51586	0.242632	0.354842	1.27885	0.328383	0.89695	0.662573	0.639612
NRP1	2.39764	2.23545	2.15547	0.162193	1.11899	0.484253	0.242174	1.18277	0.23965	0.0799809	1.057	0.581881	0.877537	0.662573	0.785429
ANPEP	1.55639	1.46474	1.30087	0.0916482	1.06559	0.705706	0.255517	1.19376	0.236454	0.163868	1.12029	0.283014	0.89695	0.662573	0.601617
BPIFB1	5.54399	6.21671	6.07661	-0.672727	-1.59408	0.190418	-0.532622	-1.44656	0.241204	0.140105	1.10199	0.661909	0.668074	0.662573	0.820972
THBD	3.68724	3.54169	3.3013	0.145549	1.10615	0.699863	0.385939	1.30671	0.250231	0.24039	1.18131	0.311154	0.89695	0.674165	0.628096
CXCL16	6.56554	6.62052	6.26246	-0.0549821	-1.03885	0.852968	0.303085	1.23378	0.250675	0.358067	1.28171	0.0571074	0.952608	0.674165	0.389868
SERPINE1	6.2063	6.50259	5.61675	-0.296287	-1.22798	0.615849	0.589549	1.50478	0.261192	0.885837	1.84784	0.0187212	0.884408	0.693725	0.332302
PCSK9	2.14337	2.28199	2.39448	-0.138616	-1.10085	0.582155	-0.25111	-1.19012	0.261857	-0.112494	-1.0811	0.476507	0.877537	0.693725	0.723997
PTPRF	3.77029	3.85651	3.53229	-0.0862268	-1.06159	0.720968	0.237991	1.17935	0.267388	0.324218	1.25199	0.0347279	0.89695	0.703131	0.360161
TIMP1	6.82651	6.65707	6.48003	0.169446	1.12463	0.633263	0.346482	1.27146	0.272143	0.177036	1.13056	0.427052	0.885073	0.710374	0.692253
TIA1	0.552414	0.847256	0.717175	-0.294842	-1.22675	0.0872386	-0.16476	-1.12098	0.277689	0.130082	1.09436	0.226407	0.617958	0.717381	0.5721
ITGB2	5.23117	5.08311	4.99592	0.148065	1.10808	0.545063	0.235251	1.17711	0.278869	0.0871863	1.0623	0.569629	0.877537	0.717381	0.778435
LGALS3	4.19397	4.29269	3.87789	-0.0987223	-1.07082	0.768847	0.316077	1.24494	0.289668	0.414799	1.33311	0.0517006	0.922096	0.719315	0.38145
PDGFA	1.3129	1.82934	1.67728	-0.516437	-1.43042	0.183164	-0.364382	-1.28733	0.287853	0.152056	1.11115	0.529904	0.668074	0.719315	0.767821
PILRB	3.00056	3.01322	2.5737	-0.0126616	-1.00881	0.977732	0.426861	1.34431	0.289752	0.439522	1.35616	0.125111	0.993857	0.719315	0.445742
PLA2G2A	1.96899	2.56853	2.66882	-0.599546	-1.51524	0.418397	-0.699834	-1.62432	0.286906	-0.100289	-1.07199	0.828682	0.850391	0.719315	0.928611
CGREF1	3.15787	2.77819	2.68868	0.379678	1.30105	0.442354	0.46919	1.38433	0.2846	0.0895119	1.06401	0.772245	0.867601	0.719315	0.898842
CSTB	3.17033	3.28285	2.67255	-0.112521	-1.08112	0.83358	0.497778	1.41204	0.295583	0.610299	1.52658	0.0720621	0.951436	0.728694	0.433373
SFTPD	3.47914	4.14254	4.00548	-0.663395	-1.5838	0.253452	-0.526335	-1.44027	0.305812	0.137059	1.09966	0.705513	0.758274	0.734479	0.865348
PGLYRP1	4.93641	5.92436	5.41697	-0.987948	-1.98336	0.0657337	-0.480558	-1.39528	0.308274	0.50739	1.42148	0.130178	0.617958	0.734479	0.453071
DPT	4.59507	5.26178	4.93194	-0.66671	-1.58745	0.0737581	-0.336869	-1.26301	0.304121	0.329841	1.25688	0.156482	0.617958	0.734479	0.491602
F7	3.09926	3.51256	3.38488	-0.413299	-1.33173	0.191849	-0.285626	-1.21894	0.307347	0.127673	1.09253	0.518281	0.668074	0.734479	0.757117
FAS	6.61396	6.79372	6.29457	-0.179762	-1.1327	0.609878	0.319386	1.2478	0.307228	0.499148	1.41338	0.0260869	0.884408	0.734479	0.360161
REN	2.5281	2.77231	2.00275	-0.244206	-1.18444	0.681252	0.525347	1.43928	0.31969	0.769554	1.70474	0.041596	0.89695	0.746597	0.360161
CLTA	0.322371	0.646881	0.472889	-0.32451	-1.25224	0.0607127	-0.150518	-1.10997	0.321773	0.173992	1.12818	0.107529	0.617958	0.746597	0.439793
HK2	0.399086	0.350006	0.493878	0.0490795	1.0346	0.647597	-0.0947925	-1.06791	0.320051	-0.143872	-1.10487	0.0350758	0.887633	0.746597	0.360161
ICAM5	2.51211	2.31577	2.25022	0.196339	1.14579	0.508609	0.261892	1.19905	0.320312	0.0655532	1.04649	0.724491	0.877537	0.746597	0.8689
PRSS27	2.73449	3.29739	3.06729	-0.562902	-1.47724	0.141554	-0.332805	-1.25946	0.32443	0.230097	1.17291	0.335718	0.633352	0.747874	0.639612
TNC	3.6721	3.59586	3.28608	0.0762375	1.05426	0.864523	0.38602	1.30678	0.330764	0.309783	1.23952	0.270599	0.95908	0.752656	0.591326
ZBTB17	1.35044	1.22172	1.11336	0.128724	1.09333	0.645013	0.237081	1.17861	0.339111	0.108357	1.078	0.536344	0.887633	0.752656	0.769397
BMP6	2.61493	2.4422	2.41415	0.172729	1.12719	0.467961	0.200781	1.14932	0.341345	0.0280527	1.01963	0.850587	0.876584	0.752656	0.93197
CNTN1	2.00116	2.03633	1.81125	-0.0351741	-1.02468	0.875346	0.189912	1.14069	0.340279	0.225086	1.16885	0.112254	0.959098	0.752656	0.439793
EDIL3	2.94446	2.65912	2.65051	0.285338	1.2187	0.405832	0.293946	1.22599	0.333935	0.00860784	1.00598	0.968014	0.850391	0.752656	0.984656
EGFR	2.75211	2.6163	2.61833	0.135814	1.09871	0.382382	0.133789	1.09717	0.331489	-0.00202545	-1.0014	0.983376	0.850391	0.752656	0.997424
IL19	3.16956	3.11002	2.64522	0.0595321	1.04213	0.92336	0.524337	1.43827	0.340114	0.464805	1.38013	0.233008	0.973953	0.752656	0.581562
EIF4EBP1	4.44167	4.59891	3.91164	-0.157241	-1.11515	0.803456	0.530028	1.44396	0.34481	0.687269	1.61023	0.0856775	0.93441	0.755601	0.439793
TGM2	4.72637	4.68111	4.28198	0.0452652	1.03187	0.934516	0.444391	1.36074	0.36366	0.399126	1.31871	0.249839	0.97412	0.768448	0.591326
TIE1	4.55417	4.65961	4.32987	-0.105435	-1.07582	0.698613	0.224297	1.16821	0.353439	0.329732	1.25678	0.0562303	0.89695	0.768448	0.389868
AHCY	1.79059	1.78266	1.49471	0.00792321	1.00551	0.982527	0.295875	1.22763	0.357101	0.287952	1.22091	0.20658	0.993857	0.768448	0.543228
AMY2A	0.967343	1.81929	1.29789	-0.851951	-1.80494	0.0385594	-0.330546	-1.25749	0.359139	0.521405	1.43535	0.0432425	0.617958	0.768448	0.363257
BOC	2.49341	2.39801	2.25918	0.095408	1.06837	0.740924	0.234236	1.17628	0.3605	0.138828	1.10101	0.44349	0.90078	0.768448	0.709185
CLEC1A	2.05501	2.01169	1.76352	0.0433205	1.03048	0.90419	0.291496	1.22391	0.3617	0.248176	1.1877	0.273176	0.96975	0.768448	0.591326
TGFBI	4.83293	4.75772	4.65749	0.0752036	1.05351	0.733026	0.175438	1.12931	0.369978	0.100234	1.07195	0.468865	0.89695	0.772602	0.723997
AMY2B	0.859214	1.67934	1.16963	-0.820123	-1.76556	0.0378926	-0.31042	-1.24007	0.369248	0.509703	1.42376	0.039502	0.617958	0.772602	0.360161
CD55	3.90036	3.76196	3.60224	0.138395	1.10068	0.715926	0.298121	1.22954	0.377072	0.159726	1.11708	0.503269	0.89695	0.778258	0.74133
CORO1A	0.920557	1.51766	1.25733	-0.597105	-1.51268	0.165661	-0.336772	-1.26293	0.375451	0.260333	1.19776	0.33331	0.668074	0.778258	0.639612
TYMP	4.22634	4.06175	3.85447	0.164593	1.12085	0.731267	0.371874	1.29403	0.381929	0.207281	1.15451	0.490695	0.89695	0.780468	0.731919
UMOD	3.27894	2.67149	2.95843	0.607455	1.52357	0.147088	0.320512	1.24877	0.385498	-0.286943	-1.22005	0.273089	0.633352	0.780468	0.591326
PLIN3	2.00217	2.19773	1.74778	-0.19556	-1.14517	0.555343	0.25439	1.19283	0.386936	0.449949	1.36599	0.0328095	0.877537	0.780468	0.360161
AXL	3.40276	3.35073	3.15222	0.0520259	1.03672	0.872151	0.250537	1.18965	0.38268	0.198511	1.14751	0.328774	0.959098	0.780468	0.639612
C1QTNF1	3.44847	3.23826	3.267	0.210209	1.15686	0.384101	0.181468	1.13404	0.396114	-0.0287411	-1.02012	0.849063	0.850391	0.785589	0.93197
C2	4.64033	4.66541	4.4328	-0.0250839	-1.01754	0.927407	0.207532	1.15471	0.395785	0.232616	1.17496	0.18029	0.973953	0.785589	0.516152
GRK5	0.581543	0.482419	0.440575	0.0991241	1.07112	0.596282	0.140968	1.10264	0.395603	0.0418442	1.02943	0.721121	0.884408	0.785589	0.8689
SPON2	4.86151	4.85153	4.5212	0.00998304	1.00694	0.982731	0.340314	1.26603	0.405809	0.330331	1.2573	0.255254	0.993857	0.791551	0.591326
LGALS1	3.16317	3.60924	2.90153	-0.446072	-1.36233	0.208761	0.261641	1.19884	0.403697	0.707713	1.63321	0.00195936	0.701396	0.791551	0.0579645
NADK	3.07156	3.13429	2.74264	-0.0627304	-1.04444	0.887286	0.328914	1.25607	0.402411	0.391644	1.31189	0.160738	0.962262	0.791551	0.493035
SPP1	8.54466	8.42988	8.14606	0.114776	1.08281	0.833398	0.398595	1.31822	0.410419	0.283819	1.21741	0.40764	0.951436	0.796168	0.6794
SEMA3F	1.90179	1.9657	1.72363	-0.0639143	-1.0453	0.802851	0.178157	1.13144	0.432808	0.242071	1.18269	0.134254	0.93441	0.810924	0.462719
SERPINA11	6.25801	6.48153	6.53712	-0.223517	-1.16758	0.573139	-0.279106	-1.21344	0.427392	-0.0555888	-1.03928	0.822947	0.877537	0.810924	0.928611
MNDA	2.04347	2.05366	1.65714	-0.0101848	-1.00708	0.985226	0.386331	1.30707	0.428625	0.396516	1.31633	0.252154	0.993857	0.810924	0.591326
ADAM15	4.12499	3.70458	3.90529	0.420404	1.3383	0.175654	0.2197	1.16449	0.422321	-0.200704	-1.14926	0.301076	0.668074	0.810924	0.617815
CD2AP	4.04114	4.6868	4.43423	-0.645657	-1.56445	0.256224	-0.393084	-1.3132	0.434016	0.252573	1.19133	0.477429	0.758274	0.810924	0.723997
CNDP1	0.600014	0.999637	0.835638	-0.399623	-1.31916	0.237807	-0.235624	-1.17742	0.430676	0.163999	1.12039	0.438367	0.747093	0.810924	0.705395
CTSH	2.996	2.77942	2.73494	0.216575	1.16197	0.559675	0.261056	1.19836	0.427638	0.0444814	1.03131	0.848265	0.877537	0.810924	0.93197
ACE2	1.77611	1.84645	1.47416	-0.0703357	-1.04996	0.874061	0.301951	1.23281	0.443113	0.372286	1.2944	0.183309	0.959098	0.823586	0.520598
AK1	2.40116	2.41995	2.046	-0.0187929	-1.01311	0.972094	0.355155	1.27912	0.456174	0.373948	1.29589	0.268736	0.993857	0.843448	0.591326
FAM3C	5.48751	6.55023	5.89872	-1.06271	-2.08885	0.09556	-0.411204	-1.3298	0.463069	0.651507	1.57081	0.102917	0.617958	0.847566	0.439793
GLRX	3.52769	3.74523	3.23821	-0.217539	-1.16275	0.625052	0.289477	1.2222	0.463177	0.507016	1.42111	0.0720284	0.884408	0.847566	0.433373
PRKAR1A	2.61409	3.20833	2.9582	-0.594246	-1.50968	0.266291	-0.344116	-1.26937	0.466212	0.250129	1.18931	0.454339	0.758274	0.848745	0.716846
PDCD6	2.58791	2.35257	2.33931	0.235346	1.17719	0.545404	0.2486	1.18805	0.470975	0.0132542	1.00923	0.956621	0.877537	0.849702	0.984656
ADH4	2.24111	2.81891	1.79912	-0.577792	-1.49256	0.404847	0.441994	1.35848	0.471525	1.01979	2.02762	0.0209359	0.850391	0.849702	0.353916
GP1BA	4.35854	4.70888	4.54469	-0.350338	-1.27486	0.235483	-0.186146	-1.13772	0.475246	0.164192	1.12054	0.374064	0.747093	0.852082	0.663963
SUSD1	0.929314	1.03977	1.00169	-0.110454	-1.07957	0.342163	-0.0723712	-1.05144	0.481564	0.0380833	1.02675	0.600546	0.823401	0.859071	0.792543
S100A11	1.34213	1.85988	1.13821	-0.517753	-1.43172	0.121591	0.203919	1.15182	0.488311	0.721672	1.64909	0.000833412	0.617958	0.85947	0.0328735
PLXNB3	0.936586	0.929925	0.824964	0.00666071	1.00463	0.970629	0.111622	1.08044	0.486651	0.104961	1.07547	0.356	0.993857	0.85947	0.651443
CD14	6.39081	6.60086	6.62401	-0.210042	-1.15672	0.580863	-0.233198	-1.17544	0.489051	-0.0231565	-1.01618	0.922561	0.877537	0.85947	0.97744
SCARF1	3.33291	3.81805	3.54028	-0.485136	-1.39972	0.158491	-0.207364	-1.15458	0.493883	0.277772	1.21232	0.197207	0.661933	0.863687	0.534516
ANGPTL1	1.73651	1.59848	1.59151	0.138033	1.1004	0.572421	0.145007	1.10574	0.503262	0.00697398	1.00485	0.963669	0.877537	0.871503	0.984656
CTSZ	1.38709	1.47001	1.52122	-0.0829205	-1.05916	0.71218	-0.134132	-1.09743	0.500821	-0.0512119	-1.03613	0.716218	0.89695	0.871503	0.8689
GLO1	6.14719	6.31025	5.84468	-0.163064	-1.11966	0.752868	0.302504	1.23328	0.509987	0.465568	1.38086	0.154179	0.909075	0.876981	0.489157
GUSB	2.39194	2.45233	2.18084	-0.0603821	-1.04274	0.867714	0.211106	1.15758	0.511367	0.271489	1.20705	0.234347	0.959098	0.876981	0.581562
SPARCL1	3.89164	4.03946	3.717	-0.147813	-1.10789	0.632653	0.174646	1.12869	0.523876	0.32246	1.25046	0.0989992	0.885073	0.894115	0.439793
NOTCH3	3.00584	2.89349	2.83624	0.112349	1.08099	0.711821	0.169606	1.12475	0.529212	0.0572574	1.04049	0.763868	0.89695	0.898901	0.893016
REG3A	4.80041	5.08089	4.4126	-0.280479	-1.2146	0.702104	0.387811	1.30841	0.550655	0.66829	1.58919	0.148605	0.89695	0.910096	0.488471
THPO	1.33724	1.53543	1.46314	-0.198188	-1.14726	0.411573	-0.125901	-1.09119	0.555396	0.0722876	1.05138	0.63227	0.850391	0.910096	0.812082
PPP1R2	1.0397	1.63738	1.21739	-0.597681	-1.51328	0.0824405	-0.177695	-1.13107	0.556312	0.419987	1.33792	0.052137	0.617958	0.910096	0.38145
CA1	7.82264	7.80856	7.50143	0.0140804	1.00981	0.981554	0.32121	1.24938	0.551896	0.30713	1.23724	0.422048	0.993857	0.910096	0.689148
COMP	6.04971	6.24498	5.84241	-0.195261	-1.14493	0.618267	0.207307	1.15453	0.550366	0.402568	1.32186	0.103973	0.884408	0.910096	0.439793
COMT	2.90413	3.86865	3.17926	-0.964521	-1.95142	0.0666833	-0.275135	-1.21011	0.550694	0.689386	1.6126	0.0371459	0.617958	0.910096	0.360161
EPHB4	4.01886	3.99771	3.83672	0.0211509	1.01477	0.951379	0.182134	1.13456	0.553693	0.160983	1.11805	0.459874	0.984664	0.910096	0.719186
IL18BP	2.18353	1.96416	1.98661	0.219366	1.16422	0.552308	0.196916	1.14625	0.546897	-0.0224502	-1.01568	0.92261	0.877537	0.910096	0.97744
VIM	1.21623	1.35124	1.03517	-0.135015	-1.0981	0.700288	0.181054	1.13371	0.560208	0.316069	1.24493	0.15314	0.89695	0.912265	0.489157
CCDC80	4.46414	4.81434	4.66998	-0.350201	-1.27474	0.387937	-0.205835	-1.15335	0.566074	0.144366	1.10524	0.569613	0.850391	0.917609	0.778435
CPA1	5.3634	5.85526	5.05523	-0.491856	-1.40625	0.421602	0.308169	1.23814	0.569213	0.800025	1.74113	0.0393705	0.850391	0.918503	0.360161
QDPR	3.22627	3.59578	3.01594	-0.36951	-1.29191	0.390145	0.210331	1.15695	0.580137	0.579841	1.49468	0.0336527	0.850391	0.927696	0.360161
CRTAC1	2.3827	2.69868	2.5819	-0.315975	-1.24485	0.43635	-0.199202	-1.14806	0.579106	0.116773	1.08431	0.64585	0.865388	0.927696	0.817819
MFAP5	3.47721	4.11581	3.68812	-0.638592	-1.55681	0.145499	-0.210908	-1.15742	0.584919	0.427684	1.34507	0.120243	0.633352	0.931149	0.444649
ITIH3	1.83257	1.95301	1.99852	-0.120441	-1.08707	0.728874	-0.16595	-1.1219	0.589874	-0.0455093	-1.03205	0.834442	0.89695	0.934845	0.928611
LBP	4.04661	4.19	4.24623	-0.143386	-1.10449	0.734828	-0.199617	-1.14839	0.594597	-0.0562309	-1.03975	0.832133	0.89695	0.938142	0.928611
SERPINB5	0.281514	0.668931	0.387996	-0.387417	-1.30805	0.145618	-0.106482	-1.0766	0.649423	0.280935	1.21498	0.0930522	0.633352	0.941001	0.439793
SELE	6.00423	5.6943	5.8161	0.309929	1.23965	0.487275	0.188132	1.13929	0.633667	-0.121796	-1.08809	0.662877	0.877537	0.941001	0.820972
SNX9	2.31104	2.6973	2.49927	-0.386257	-1.307	0.390263	-0.188224	-1.13936	0.635793	0.198033	1.14713	0.481863	0.850391	0.941001	0.723997
STK11	2.2423	2.20504	2.05809	0.0372562	1.02616	0.928712	0.184209	1.13619	0.617695	0.146953	1.10723	0.573839	0.973953	0.941001	0.780508
THBS4	4.1888	4.31618	3.97777	-0.127375	-1.0923	0.778794	0.211031	1.15752	0.599462	0.338406	1.26436	0.235901	0.929602	0.941001	0.581562
SIRPA	6.41336	6.28244	6.26157	0.13092	1.09499	0.724005	0.151788	1.11095	0.643957	0.0208684	1.01457	0.92842	0.89695	0.941001	0.97801
TNF	1.29039	1.22815	1.41371	0.0622357	1.04408	0.829767	-0.12332	-1.08924	0.630668	-0.185555	-1.13725	0.30807	0.951436	0.941001	0.628096
VAMP5	1.01611	1.123	1.12484	-0.106886	-1.0769	0.663235	-0.108726	-1.07828	0.617007	-0.00184	-1.00128	0.990452	0.89695	0.941001	0.997894
MCAM	1.08611	1.2623	0.984824	-0.176186	-1.12989	0.460982	0.101291	1.07273	0.63185	0.277476	1.21207	0.0665296	0.876584	0.941001	0.414351
NID1	3.86601	4.02515	3.74862	-0.159136	-1.11662	0.551481	0.117392	1.08477	0.619692	0.276528	1.21128	0.101393	0.877537	0.941001	0.439793
PRSS2	2.47614	3.19792	2.76091	-0.721776	-1.64921	0.269415	-0.28477	-1.21822	0.621541	0.437006	1.35379	0.285932	0.758274	0.941001	0.601807
ADAMTS13	3.98573	3.9116	4.06482	0.0741286	1.05272	0.698978	-0.0790914	-1.05635	0.641351	-0.15322	-1.11205	0.204463	0.89695	0.941001	0.543228
CHL1	2.52019	2.50922	2.42346	0.0109607	1.00763	0.963462	0.0967221	1.06934	0.648267	0.0857614	1.06125	0.567854	0.993857	0.941001	0.778435
COL1A1	0.499329	0.709606	0.590373	-0.210278	-1.15691	0.31739	-0.0910442	-1.06514	0.624064	0.119234	1.08616	0.365448	0.812971	0.941001	0.661908
CST6	3.22051	3.86998	3.44691	-0.649467	-1.56859	0.229822	-0.226397	-1.16991	0.635052	0.42307	1.34078	0.212223	0.747086	0.941001	0.553123
DLK1	4.59697	4.89522	4.81735	-0.298247	-1.22965	0.580573	-0.220376	-1.16504	0.644661	0.0778715	1.05546	0.817813	0.877537	0.941001	0.928611
GH1	5.55514	5.73455	5.15995	-0.179407	-1.13242	0.852146	0.395192	1.31512	0.643123	0.574599	1.48926	0.342328	0.952608	0.941001	0.639612
GHRL	3.44314	3.36319	3.75315	0.0799491	1.05698	0.913479	-0.310008	-1.23971	0.63449	-0.389957	-1.31035	0.398945	0.973829	0.941001	0.677547
GYS1	2.16631	2.71819	2.36434	-0.551879	-1.46599	0.256356	-0.198029	-1.14713	0.644375	0.35385	1.27797	0.24571	0.758274	0.941001	0.591326
GZMH	1.94071	1.89794	1.74174	0.0427768	1.03009	0.927321	0.198974	1.14788	0.632103	0.156197	1.11435	0.595496	0.973953	0.941001	0.790845
NTproBNP	3.70846	4.41339	3.24872	-0.70493	-1.63007	0.543391	0.459737	1.37529	0.654299	1.16467	2.24182	0.111789	0.877537	0.944211	0.439793
SOD1	1.56227	1.80374	1.41215	-0.241466	-1.18219	0.528275	0.150117	1.10966	0.65774	0.391583	1.31183	0.10535	0.877537	0.945335	0.439793
ROR1	1.48224	1.54254	1.36391	-0.0603009	-1.04268	0.8522	0.118332	1.08548	0.679842	0.178633	1.13181	0.379748	0.952608	0.952967	0.669227
KYAT1	4.13331	4.63314	3.93923	-0.499829	-1.41405	0.340552	0.194082	1.144	0.675263	0.693911	1.61766	0.0369275	0.823401	0.952967	0.360161
MET	4.6734	4.98661	4.74619	-0.313206	-1.24247	0.107988	-0.0727945	-1.05175	0.670641	0.240412	1.18133	0.0500016	0.617958	0.952967	0.38145
OLR1	2.89489	3.06638	2.75719	-0.171496	-1.12623	0.638445	0.137698	1.10015	0.670041	0.309194	1.23902	0.178836	0.887633	0.952967	0.516152
PLA2G1B	3.86186	5.26337	4.07641	-1.40152	-2.64179	0.0190266	-0.214556	-1.16035	0.679794	1.18696	2.27673	0.00179098	0.575002	0.952967	0.0577998
CCL16	6.07964	6.53229	5.92155	-0.452645	-1.36855	0.290884	0.158092	1.11581	0.676034	0.610737	1.52704	0.0248534	0.77642	0.952967	0.360161
HYOU1	3.4453	3.82171	3.53475	-0.376412	-1.29811	0.12934	-0.0894527	-1.06397	0.681841	0.28696	1.22007	0.0660615	0.628002	0.952967	0.414351
ITGB1	2.55634	2.68692	2.48366	-0.130576	-1.09473	0.520186	0.072681	1.05167	0.685815	0.203257	1.15129	0.112798	0.877537	0.954573	0.439793
NCAM1	1.52579	1.76539	1.59875	-0.239608	-1.18067	0.245392	-0.0729688	-1.05188	0.688368	0.166639	1.12244	0.197912	0.757514	0.954573	0.534516
TGFBR3	4.36219	4.56602	4.23971	-0.203839	-1.15176	0.586635	0.122477	1.0886	0.712042	0.326316	1.25381	0.167234	0.877537	0.954672	0.507421
APLP1	1.51773	1.44524	1.39794	0.0724848	1.05153	0.839915	0.119785	1.08657	0.706294	0.0473001	1.03333	0.833436	0.951436	0.954672	0.928611
CANT1	3.38947	3.46937	3.32016	-0.0798973	-1.05694	0.696573	0.0693132	1.04922	0.702443	0.149211	1.10896	0.247186	0.89695	0.954672	0.591326
CCN3	3.38156	4.31343	3.59981	-0.931874	-1.90775	0.146735	-0.218248	-1.16332	0.699255	0.713626	1.63992	0.0772476	0.633352	0.954672	0.433373
CDHR5	2.48817	2.31626	2.38092	0.171915	1.12655	0.579919	0.107248	1.07717	0.696441	-0.0646674	-1.04584	0.739597	0.877537	0.954672	0.881006
CHI3L1	4.1544	3.93854	3.9162	0.215856	1.16139	0.764942	0.238202	1.17952	0.709495	0.0223456	1.01561	0.960604	0.920523	0.954672	0.984656
CHRDL2	2.61766	2.76323	2.76599	-0.145574	-1.10617	0.748876	-0.148334	-1.10829	0.712643	-0.00275966	-1.00191	0.992273	0.907341	0.954672	0.997894
COL6A3	6.46394	6.91193	6.24403	-0.447988	-1.36414	0.499389	0.219916	1.16467	0.707788	0.667904	1.58876	0.110633	0.877537	0.954672	0.439793
HMOX1	5.49081	5.86804	5.29509	-0.377229	-1.29885	0.498694	0.195729	1.1453	0.691514	0.572958	1.48757	0.103662	0.877537	0.954672	0.439793
MPHOSPH8	0.495857	0.669713	0.413338	-0.173855	-1.12807	0.502719	0.082519	1.05887	0.719136	0.256374	1.19447	0.117305	0.877537	0.959305	0.441771
EPHX2	0.291571	0.428581	0.216647	-0.13701	-1.09962	0.568008	0.0749242	1.05331	0.724208	0.211934	1.15824	0.161104	0.877537	0.959305	0.493035
GPR37	3.64083	3.65171	3.43435	-0.0108839	-1.00757	0.986749	0.206481	1.15387	0.722103	0.217365	1.16261	0.597032	0.993857	0.959305	0.790845
GSTA1	4.05119	5.93939	3.75782	-1.8882	-3.70174	0.0507723	0.293369	1.2255	0.728579	2.18157	4.53647	0.000467677	0.617958	0.961508	0.0300586
ADAMTS16	0.473029	0.437819	0.530347	0.0352098	1.02471	0.853322	-0.0573187	-1.04053	0.734023	-0.0925285	-1.06624	0.439133	0.952608	0.965105	0.705395
SSC4D	2.32294	2.02256	2.15167	0.30038	1.23147	0.631334	0.171277	1.12606	0.757234	-0.129103	-1.09361	0.74203	0.885073	0.973739	0.881006
LEP	1.89576	2.40802	2.10782	-0.512268	-1.42629	0.52348	-0.212061	-1.15834	0.765277	0.300207	1.23132	0.550779	0.877537	0.973739	0.769789
MCFD2	2.63107	2.82943	2.52261	-0.198354	-1.14739	0.623198	0.108462	1.07808	0.76148	0.306816	1.23697	0.227228	0.884408	0.973739	0.5721
PLPBP	2.27399	3.00171	2.40471	-0.727727	-1.65603	0.121734	-0.130725	-1.09484	0.751735	0.597002	1.51257	0.0440001	0.617958	0.973739	0.363257
PRCP	2.74494	2.70824	2.81519	0.0366991	1.02576	0.884474	-0.0702481	-1.0499	0.753525	-0.106947	-1.07695	0.49996	0.962262	0.973739	0.739524
CELA3A	2.72166	3.05536	2.56813	-0.333705	-1.26025	0.54435	0.15353	1.11229	0.752569	0.487235	1.40176	0.160143	0.877537	0.973739	0.493035
CNPY2	0.748	0.749387	0.688916	-0.0013875	-1.00096	0.995008	0.0590836	1.0418	0.763574	0.0604711	1.04281	0.663715	0.995008	0.973739	0.820972
CTSB	3.34311	3.64977	3.24549	-0.306661	-1.23684	0.400436	0.0976252	1.07001	0.761963	0.404286	1.32343	0.0793501	0.850391	0.973739	0.433373
GDF2	3.04626	3.22278	3.1435	-0.176524	-1.13016	0.608594	-0.0972447	-1.06973	0.74993	0.0792794	1.05649	0.713567	0.884408	0.973739	0.8689
NTRK2	1.22887	1.38572	1.17257	-0.156847	-1.11485	0.476652	0.0563005	1.0398	0.772664	0.213148	1.15921	0.125163	0.877537	0.976141	0.445742
PAG1	3.1467	3.63284	3.25159	-0.486144	-1.4007	0.236834	-0.104887	-1.07541	0.77221	0.381256	1.30248	0.139894	0.747093	0.976141	0.469126
QPCT	3.4936	4.0238	3.52964	-0.5302	-1.44413	0.0866043	-0.0360418	-1.0253	0.894321	0.494158	1.4085	0.0117767	0.617958	0.982712	0.245925
RNASET2	4.39781	4.50343	4.34691	-0.105611	-1.07595	0.684529	0.0509016	1.03591	0.824923	0.156512	1.11459	0.337972	0.89695	0.982712	0.639612
REG1A	5.7717	6.47593	5.91351	-0.704231	-1.62928	0.337778	-0.141811	-1.10329	0.826952	0.56242	1.47674	0.222841	0.823401	0.982712	0.569127
REG1B	4.08194	4.62514	3.97928	-0.543195	-1.4572	0.494994	0.102665	1.07375	0.884033	0.645859	1.56467	0.197313	0.877537	0.982712	0.534516
RETN	6.61191	6.84352	6.49039	-0.231604	-1.17414	0.6947	0.12152	1.08788	0.816052	0.353124	1.27732	0.340945	0.89695	0.982712	0.639612
SDC4	2.5383	2.8629	2.60087	-0.3246	-1.25232	0.410492	-0.0625691	-1.04432	0.857516	0.262031	1.19917	0.289884	0.850391	0.982712	0.601807
SLITRK6	2.34461	2.72618	2.38501	-0.381567	-1.30276	0.21581	-0.0403912	-1.02839	0.881783	0.341176	1.26679	0.0790126	0.716004	0.982712	0.433373
SSC5D	2.97811	3.12302	3.02801	-0.144904	-1.10566	0.584052	-0.0499003	-1.03519	0.831263	0.0950042	1.06807	0.566915	0.877537	0.982712	0.778435
ST6GAL1	5.11116	5.48371	5.06936	-0.372555	-1.29464	0.175777	0.0417953	1.02939	0.862999	0.414351	1.3327	0.0177072	0.668074	0.982712	0.330846
TFF3	2.38256	2.71364	2.30053	-0.33108	-1.25796	0.579226	0.0820226	1.0585	0.8766	0.413103	1.33155	0.271116	0.877537	0.982712	0.591326
TIMD4	3.45336	3.33254	3.3642	0.120813	1.08735	0.799041	0.0891553	1.06375	0.831972	-0.0316581	-1.02219	0.915224	0.93441	0.982712	0.975689
PTGDS	4.64427	5.07266	4.71339	-0.428391	-1.34573	0.450277	-0.0691158	-1.04907	0.890398	0.359275	1.28278	0.313163	0.873004	0.982712	0.628096
PTPRS	2.86321	3.10297	2.81145	-0.239754	-1.18079	0.352158	0.0517597	1.03653	0.820078	0.291514	1.22392	0.0733484	0.83344	0.982712	0.433373
TNFRSF10C	3.59721	3.56327	3.54985	0.0339455	1.02381	0.930057	0.0473652	1.03338	0.890006	0.0134197	1.00935	0.955852	0.973953	0.982712	0.984656
TNFSF13B	4.6282	4.30851	4.69747	0.319694	1.24807	0.440451	-0.0692727	-1.04919	0.850001	-0.388966	-1.30945	0.136417	0.867601	0.982712	0.465653
VASN	2.25649	2.43276	2.21772	-0.176277	-1.12996	0.428572	0.0387675	1.02724	0.843835	0.215044	1.16074	0.125561	0.854737	0.982712	0.445742
VSTM2L	-0.0134571	0.0118125	-0.0441182	-0.0252696	-1.01767	0.891786	0.030661	1.02148	0.852135	0.0559307	1.03953	0.631189	0.962262	0.982712	0.812082
XG	2.39234	2.71042	2.32722	-0.318082	-1.24667	0.567359	0.0651229	1.04617	0.894692	0.383205	1.30424	0.273047	0.877537	0.982712	0.591326
KIT	1.76943	1.79052	1.72899	-0.0210902	-1.01473	0.939418	0.0404358	1.02842	0.869307	0.061526	1.04357	0.723649	0.975127	0.982712	0.8689
LILRB2	6.52873	6.37603	6.49092	0.152697	1.11165	0.604414	0.0378104	1.02655	0.884725	-0.114887	-1.08289	0.534199	0.884408	0.982712	0.769397
MMP7	1.62334	1.77112	1.55915	-0.147776	-1.10786	0.696336	0.0641901	1.0455	0.848127	0.211966	1.15827	0.372838	0.89695	0.982712	0.663963
NECTIN2	6.20566	6.46035	6.14506	-0.254693	-1.19308	0.612498	0.060599	1.0429	0.891664	0.315292	1.24426	0.318342	0.884408	0.982712	0.631348
NPDC1	2.9327	3.54976	2.82003	-0.617056	-1.53374	0.274869	0.112671	1.08123	0.821193	0.729727	1.65833	0.0413893	0.758274	0.982712	0.360161
AKR1C4	0.472229	1.13958	0.430165	-0.667346	-1.58815	0.0417996	0.0420631	1.02959	0.883206	0.70941	1.63513	0.000756124	0.617958	0.982712	0.0328735
BAG6	4.44673	4.27921	4.37664	0.167516	1.12312	0.699149	0.0700904	1.04978	0.855054	-0.0974257	-1.06986	0.719883	0.89695	0.982712	0.8689
CA4	2.06904	2.25141	2.02433	-0.182363	-1.13474	0.407549	0.0447101	1.03148	0.818258	0.227074	1.17046	0.102191	0.850391	0.982712	0.439793
CCL14	7.00191	7.28033	6.96761	-0.278411	-1.21286	0.343277	0.034307	1.02406	0.894775	0.312718	1.24205	0.0915689	0.823401	0.982712	0.439793
CCL15	6.62596	6.96748	6.52957	-0.341518	-1.26709	0.416469	0.0963881	1.06909	0.795258	0.437906	1.35464	0.0987951	0.850391	0.982712	0.439793
CCL27	3.0985	2.77939	3.04591	0.319112	1.24756	0.396251	0.0525945	1.03713	0.874253	-0.266518	-1.2029	0.259209	0.850391	0.982712	0.591326
CD59	4.3117	4.56476	4.2105	-0.253056	-1.19173	0.625314	0.1012	1.07267	0.825349	0.354256	1.27833	0.27695	0.884408	0.982712	0.592273
CDH1	2.6974	2.95101	2.63974	-0.253606	-1.19218	0.448691	0.0576618	1.04078	0.845497	0.311268	1.2408	0.140077	0.873004	0.982712	0.469126
CEBPB	0.388457	0.44555	0.348998	-0.0570929	-1.04037	0.735246	0.039459	1.02773	0.791813	0.0965518	1.06921	0.362735	0.89695	0.982712	0.660363
CES1	3.96569	4.88891	4.06781	-0.923221	-1.89634	0.171302	-0.102125	-1.07335	0.863477	0.821095	1.76675	0.0537254	0.668074	0.982712	0.38145
CLUL1	2.1714	2.44346	2.21644	-0.272062	-1.20753	0.300565	-0.0450418	-1.03171	0.84601	0.227021	1.17042	0.169327	0.794671	0.982712	0.508022
COL18A1	6.41296	6.76448	6.4535	-0.351524	-1.27591	0.334512	-0.0405447	-1.0285	0.899666	0.310979	1.24055	0.174495	0.823401	0.982712	0.508022
CST3	7.23191	7.70992	7.16627	-0.478004	-1.39282	0.328486	0.0656434	1.04655	0.879178	0.543648	1.45765	0.0783564	0.823401	0.982712	0.433373
CTF1	0.106971	-0.04105	0.150109	0.148021	1.10805	0.549772	-0.0431377	-1.03035	0.843794	-0.191159	-1.14168	0.21962	0.877537	0.982712	0.564963
DNAJB8	0.2589	0.282813	0.299147	-0.0239125	-1.01671	0.899342	-0.0402473	-1.02829	0.810033	-0.0163348	-1.01139	0.890357	0.967474	0.982712	0.960719
DPP7	2.32247	2.44314	2.36018	-0.120672	-1.08724	0.647171	-0.0377086	-1.02648	0.871614	0.0829637	1.05919	0.6157	0.887633	0.982712	0.800636
FABP2	3.65579	5.82282	3.56542	-2.16704	-4.49101	0.00750235	0.0903694	1.06464	0.897374	2.25741	4.78132	1.90174e-05	0.575002	0.982712	0.00272887
FCRL1	3.47654	3.21439	3.39198	0.262149	1.19926	0.480257	0.0845592	1.06036	0.796797	-0.17759	-1.13099	0.445645	0.877537	0.982712	0.709434
HNRNPK	0.726871	0.903744	0.764344	-0.176872	-1.13043	0.398571	-0.0374722	-1.02631	0.839589	0.1394	1.10145	0.289147	0.850391	0.982712	0.601807
HSPG2	4.29921	4.90036	4.40446	-0.601148	-1.51692	0.27471	-0.105244	-1.07568	0.828383	0.495904	1.4102	0.151751	0.758274	0.982712	0.489157
IGFBP6	5.08819	5.49478	5.14487	-0.406596	-1.32555	0.412255	-0.0566816	-1.04007	0.897073	0.349914	1.27448	0.261215	0.850391	0.982712	0.591326
F9	3.46174	3.70627	3.48922	-0.244526	-1.1847	0.349858	-0.0274808	-1.01923	0.905287	0.217045	1.16235	0.186836	0.83344	0.985818	0.526403
CRX	-0.0636714	-0.0651125	-0.0406418	0.00144107	1.001	0.994912	-0.0230296	-1.01609	0.908393	-0.0244707	-1.01711	0.862867	0.995008	0.986176	0.942516
VSIR	1.21166	1.47083	1.23029	-0.259174	-1.19679	0.260772	-0.0186338	-1.013	0.926945	0.24054	1.18144	0.0975487	0.758274	0.988185	0.439793
MFAP3	0.191129	0.014025	0.178065	0.177104	1.13061	0.231492	0.0130631	1.0091	0.920234	-0.16404	-1.12042	0.0787025	0.747086	0.988185	0.433373
PON2	-0.148957	-0.185613	-0.136407	0.0366554	1.02573	0.799712	-0.0125499	-1.00874	0.921843	-0.0492052	-1.03469	0.587165	0.93441	0.988185	0.789442
ANXA4	0.427286	0.484119	0.441333	-0.056833	-1.04018	0.709572	-0.014047	-1.00978	0.917175	0.042786	1.0301	0.654714	0.89695	0.988185	0.818392
CA5A	2.1178	3.07376	2.04882	-0.955956	-1.93986	0.209431	0.06898	1.04897	0.918112	1.02494	2.03487	0.0335283	0.701396	0.988185	0.360161
IGFBP2	6.92801	7.4835	6.87855	-0.555486	-1.46966	0.360295	0.049467	1.03488	0.926499	0.604953	1.52093	0.113975	0.847051	0.988185	0.439793
TCL1B	0.123286	0.073675	0.134818	0.0496107	1.03499	0.787404	-0.0115325	-1.00803	0.94355	-0.0611432	-1.04329	0.596184	0.931761	0.989202	0.790845
LPL	5.12749	5.04181	5.1075	0.0856795	1.06119	0.841552	0.0199839	1.01395	0.958003	-0.0656956	-1.04659	0.806821	0.951436	0.989202	0.92097
LRP11	2.83494	2.98639	2.80853	-0.151451	-1.11069	0.716292	0.0264083	1.01847	0.942928	0.177859	1.1312	0.496417	0.89695	0.989202	0.737355
NPPB	3.69739	4.20997	3.64957	-0.512583	-1.4266	0.645638	0.0478184	1.0337	0.961337	0.560401	1.47468	0.423195	0.887633	0.989202	0.689148
ACOX1	0.143057	0.265694	0.133391	-0.122637	-1.08872	0.50974	0.00966623	1.00672	0.953141	0.132303	1.09604	0.257874	0.877537	0.989202	0.591326
AGXT	1.16204	2.00381	1.18986	-0.84177	-1.79225	0.171648	-0.0278171	-1.01947	0.959062	0.813952	1.75802	0.0365304	0.668074	0.989202	0.360161
ART3	2.0647	2.01876	2.09094	0.0459437	1.03236	0.910806	-0.0262364	-1.01835	0.94241	-0.0721801	-1.0513	0.778928	0.973829	0.989202	0.900715
CD93	4.60543	4.9166	4.62131	-0.311171	-1.24071	0.384161	-0.0158805	-1.01107	0.959899	0.295291	1.22713	0.189094	0.850391	0.989202	0.528571
CR2	3.49286	3.69057	3.52795	-0.197712	-1.14688	0.680653	-0.0350938	-1.02462	0.934216	0.162618	1.11932	0.589302	0.89695	0.989202	0.789442
ESAM	1.82466	2.10116	1.79671	-0.276499	-1.21125	0.462762	0.0279517	1.01956	0.933075	0.304451	1.23495	0.19875	0.876584	0.989202	0.534516
IGFBPL1	1.77337	1.88134	1.74904	-0.107972	-1.07771	0.791407	0.0243296	1.01701	0.946332	0.132302	1.09604	0.60537	0.933387	0.989202	0.79595
IGSF8	2.21683	2.46126	2.19538	-0.244434	-1.18463	0.588321	0.0214449	1.01498	0.957192	0.265879	1.20237	0.348524	0.877537	0.989202	0.647781
SELP	3.09703	3.19967	3.09356	-0.10264	-1.07374	0.780342	0.00346857	1.00241	0.991507	0.106109	1.07632	0.645701	0.929602	0.997311	0.817819
LACTB2	0.880714	1.34617	0.874553	-0.465461	-1.38076	0.109847	0.00616156	1.00428	0.980767	0.471622	1.38667	0.0107633	0.617958	0.997311	0.23881
NRCAM	4.38684	4.33234	4.38483	0.0545054	1.0385	0.891272	0.00200831	1.00139	0.995462	-0.052497	-1.03706	0.833645	0.962262	0.997311	0.928611
PAM	4.25599	4.52041	4.25169	-0.264421	-1.20115	0.279686	0.00429481	1.00298	0.984119	0.268715	1.20473	0.0815614	0.758274	0.997311	0.438701
CD209	4.04351	4.27754	4.04597	-0.234029	-1.17612	0.383785	-0.00245117	-1.0017	0.99176	0.231578	1.17412	0.170754	0.850391	0.997311	0.508022
CD46	4.32394	4.52174	4.31663	-0.197801	-1.14695	0.559027	0.00731377	1.00508	0.980514	0.205115	1.15278	0.334683	0.877537	0.997311	0.639612
CPB1	1.57193	2.29126	1.56947	-0.719328	-1.64641	0.100058	0.00245948	1.00171	0.994887	0.721787	1.64922	0.00940608	0.617958	0.997311	0.23881
EFEMP1	4.87863	5.16862	4.87377	-0.28999	-1.22263	0.478483	0.00485766	1.00337	0.989285	0.294848	1.22676	0.251574	0.877537	0.997311	0.591326
FGFR1OP	0.913986	1.12797	0.915707	-0.213983	-1.15989	0.500971	-0.00172156	-1.00119	0.995114	0.212261	1.1585	0.28797	0.877537	0.997311	0.601807
HYAL1	1.52507	1.61643	1.5256	-0.0913598	-1.06537	0.608792	-0.000532208	-1.00037	0.997311	0.0908276	1.06498	0.417545	0.884408	0.997311	0.689148
