# Supplementary material for: Metabolomic analysis of honey bee ( Apis mellifera L.) response to glyphosate exposure
Source: Royal Society of Chemistry journal article supplement (doi:10.1039/d2mo00046f), 2022-05-03
Supplement: d2mo00046f5.xlsx [file d2mo00046f5.xlsx]

## Sheet: SupplementaryTable5
marker	r	p	FDR
HSPG2	0.951538	1.06e-156	3.763e-154
CST3	0.940146	3.11e-143	1.10094e-140
FAM3C	0.937213	3.4e-140	1.2002e-137
COL6A3	0.934811	8.19e-138	2.88288e-135
EPHB4	0.932494	1.34e-135	4.7034e-133
CD59	0.930178	1.82e-133	6.37e-131
IGFBP6	0.926192	5.86e-130	2.04514e-127
CCN3	0.92501	5.89e-129	2.04972e-126
ESAM	0.92477	9.36e-129	3.24792e-126
NECTIN2	0.922647	5.31e-127	1.83726e-124
NPDC1	0.915493	1.93e-121	6.6585e-119
IL18BP	0.912541	2.74e-119	9.4256e-117
THBD	0.911659	1.16e-118	3.9788e-116
CEACAM8	0.911659	1.16e-118	3.9788e-116
PTGDS	0.909113	6.95e-117	2.36995e-114
CD46	0.904294	1.16e-113	3.944e-111
PGLYRP1	0.902511	1.65e-112	5.5935e-110
TIMP1	0.898024	1.03e-109	3.4814e-107
SPON2	0.896359	1.05e-108	3.5385e-106
FAS	0.894216	1.95e-107	6.552e-105
IGSF8	0.892887	1.15e-106	3.8525e-104
CLEC5A	0.891963	3.93e-106	1.31262e-103
CD55	0.891903	4.25e-106	1.41525e-103
DEFA1_DEFA1B	0.891328	9.06e-106	3.00792e-103
REG1A	0.888248	4.83e-104	1.59873e-101
XG	0.886777	3.1e-103	1.023e-100
COL18A1	0.884235	7.24e-102	2.38196e-99
RETN	0.880481	6.67e-100	2.18776e-97
CD93	0.877109	3.41e-98	1.11507e-95
CD69	0.870534	5.29e-95	1.72454e-92
PDGFA	0.869655	1.37e-94	4.4525e-92
TGFBR3	0.868278	6.01e-94	1.94724e-91
IGFBPL1	0.868045	7.69e-94	2.48387e-91
CLEC1A	0.863199	1.21e-91	3.8962e-89
RNASET2	0.863154	1.27e-91	4.0767e-89
SCARF1	0.863042	1.42e-91	4.544e-89
CCL14	0.860471	1.92e-90	6.1248e-88
REG3A	0.86008	2.84e-90	9.0312e-88
EFEMP1	0.856211	1.28e-88	4.0576e-86
LGALS1	0.854727	5.36e-88	1.69376e-85
IL19	0.854514	6.58e-88	2.0727e-85
CXCL5	0.854233	8.61e-88	2.70354e-85
CDH1	0.853992	1.08e-87	3.3804e-85
PAG1	0.853823	1.27e-87	3.9624e-85
GPR37	0.851841	8.29e-87	2.57819e-84
CCDC80	0.851433	1.22e-86	3.782e-84
GRAP2	0.850125	4.11e-86	1.26999e-83
ST6GAL1	0.846558	1.08e-84	3.3264e-82
SNAP23	0.846388	1.25e-84	3.8375e-82
LTBP2	0.845316	3.29e-84	1.00674e-81
NADK	0.843643	1.46e-83	4.453e-81
MCFD2	0.843102	2.35e-83	7.144e-81
REG1B	0.842755	3.19e-83	9.6657e-81
CST6	0.842518	3.93e-83	1.18686e-80
CNST	0.841472	9.81e-83	2.95281e-80
LRP11	0.839787	4.23e-82	1.269e-79
ROR1	0.839298	6.44e-82	1.92556e-79
ALCAM	0.838389	1.4e-81	4.172e-79
SEMA3F	0.837447	3.12e-81	9.2664e-79
HYOU1	0.837371	3.33e-81	9.8568e-79
TFF3	0.836381	7.69e-81	2.26855e-78
LILRA5	0.835309	1.89e-80	5.5566e-78
CGREF1	0.834108	5.13e-80	1.50309e-77
VCAM1	0.83306	1.22e-79	3.5624e-77
PDGFRA	0.830533	9.61e-79	2.79651e-76
SELP	0.829692	1.9e-78	5.51e-76
DLK1	0.829495	2.22e-78	6.4158e-76
USP8	0.829372	2.45e-78	7.056e-76
PLIN3	0.827968	7.54e-78	2.16398e-75
ITGB1BP2	0.827294	1.29e-77	3.6894e-75
PTPRS	0.827234	1.35e-77	3.8475e-75
PAM	0.827145	1.45e-77	4.118e-75
PPIB	0.826233	2.98e-77	8.4334e-75
CA13	0.826207	3.04e-77	8.5728e-75
DOK2	0.82574	4.39e-77	1.23359e-74
CTSL	0.825496	5.31e-77	1.4868e-74
SPP1	0.824984	7.93e-77	2.21247e-74
CSTB	0.82308	3.48e-76	9.6744e-74
GDF15	0.821948	8.31e-76	2.30187e-73
CANT1	0.821508	1.16e-75	3.2016e-73
DCN	0.817834	1.87e-74	5.1425e-72
CTSZ	0.817195	3.01e-74	8.2474e-72
PRKAR1A	0.815813	8.38e-74	2.28774e-71
NOTCH1	0.815333	1.19e-73	3.2368e-71
IGFBP7	0.814502	2.19e-73	5.9349e-71
DKK3	0.814034	3.09e-73	8.343e-71
DCTPP1	0.813616	4.19e-73	1.12711e-70
ACTA2	0.813061	6.28e-73	1.68304e-70
ICAM1	0.812507	9.38e-73	2.50446e-70
PPP1R2	0.812466	9.66e-73	2.56956e-70
CTSB	0.811914	1.44e-72	3.816e-70
FABP4	0.809906	6.06e-72	1.59984e-69
IL6ST	0.808432	1.72e-71	4.5236e-69
ANGPTL1	0.807228	4.02e-71	1.05324e-68
ART3	0.8064	7.18e-71	1.87398e-68
CHI3L1	0.805455	1.39e-70	3.614e-68
IGFBP2	0.804065	3.62e-70	9.3758e-68
SPARCL1	0.804011	3.75e-70	9.675e-68
S100A11	0.802824	8.48e-70	2.17936e-67
TINAGL1	0.802134	1.36e-69	3.4816e-67
CORO1A	0.800319	4.64e-69	1.1832e-66
CASP3	0.799939	5.99e-69	1.52146e-66
CD97	0.798899	1.2e-68	3.036e-66
CXCL8	0.798881	1.22e-68	3.0744e-66
HSPB1	0.796987	4.28e-68	1.07428e-65
LBP	0.79673	5.07e-68	1.2675e-65
SORT1	0.789227	6.49e-66	1.61601e-63
GYS1	0.78673	3.12e-65	7.7376e-63
DPT	0.786027	4.84e-65	1.19548e-62
CXCL16	0.785122	8.48e-65	2.08608e-62
IL1RL1	0.782573	4.07e-64	9.9715e-62
PRTN3	0.782141	5.3e-64	1.2932e-61
CD14	0.781474	7.95e-64	1.93185e-61
TNFRSF10C	0.780636	1.32e-63	3.1944e-61
MFAP5	0.779838	2.14e-63	5.1574e-61
TFPI	0.779423	2.75e-63	6.6e-61
MMP7	0.77866	4.34e-63	1.03726e-60
NID1	0.777412	9.13e-63	2.17294e-60
WASF1	0.776362	1.7e-62	4.029e-60
LRMP	0.774524	5.02e-62	1.18472e-59
DIABLO	0.774419	5.34e-62	1.2549e-59
TNC	0.773498	9.15e-62	2.1411e-59
OLR1	0.772389	1.74e-61	4.0542e-59
PEAR1	0.771155	3.56e-61	8.2592e-59
ITGB1	0.770959	3.98e-61	9.1938e-59
ACE2	0.76954	8.98e-61	2.0654e-58
CDH2	0.766336	5.52e-60	1.26408e-57
NRP1	0.76579	7.49e-60	1.70772e-57
RNASE3	0.764291	1.73e-59	3.9271e-57
PILRB	0.762448	4.8e-59	1.0848e-56
COL1A1	0.762075	5.9e-59	1.3275e-56
NOTCH3	0.760778	1.2e-58	2.688e-56
TYMP	0.760398	1.48e-58	3.3004e-56
SDC4	0.760372	1.5e-58	3.33e-56
IGFBP1	0.759907	1.93e-58	4.2653e-56
NTproBNP	0.757411	7.46e-58	1.6412e-55
SERPINE1	0.756192	1.43e-57	3.1317e-55
PLXNB2	0.754075	4.42e-57	9.6356e-55
GAS6	0.752106	1.25e-56	2.7125e-54
BOC	0.751881	1.4e-56	3.024e-54
COMT	0.748454	8.32e-56	1.7888e-53
MSMB	0.748412	8.51e-56	1.82114e-53
TCN2	0.746887	1.86e-55	3.9618e-53
MNDA	0.746177	2.67e-55	5.6604e-53
MB	0.745751	3.32e-55	7.0052e-53
PCOLCE	0.743981	8.14e-55	1.7094e-52
CD163	0.741022	3.59e-54	7.5031e-52
LPL	0.740141	5.56e-54	1.15648e-51
ENTPD6	0.738453	1.28e-53	2.6496e-51
PRSS2	0.738423	1.3e-53	2.678e-51
PLA2G2A	0.737569	1.97e-53	4.0385e-51
SDC1	0.737319	2.23e-53	4.5492e-51
CD209	0.736424	3.45e-53	7.0035e-51
FGFR1OP	0.735559	5.26e-53	1.06252e-50
VSIR	0.734099	1.07e-52	2.1507e-50
CCL15	0.733814	1.22e-52	2.44e-50
STK4	0.731978	2.95e-52	5.8705e-50
PLAT	0.731306	4.06e-52	8.0388e-50
GPNMB	0.730951	4.81e-52	9.4757e-50
CLC	0.73077	5.24e-52	1.02704e-49
PTPRF	0.729756	8.47e-52	1.65165e-49
FADD	0.727202	2.82e-51	5.4708e-49
ICAM2	0.727033	3.05e-51	5.8865e-49
PCSK9	0.726724	3.52e-51	6.7584e-49
BLMH	0.726533	3.85e-51	7.3535e-49
SNX9	0.724494	9.91e-51	1.8829e-48
CLTA	0.723819	1.35e-50	2.5515e-48
RARRES2	0.722146	2.91e-50	5.4708e-48
CCL27	0.721487	3.94e-50	7.3678e-48
PLXNB3	0.719813	8.42e-50	1.56612e-47
ENG	0.719328	1.05e-49	1.9425e-47
FETUB	0.718491	1.53e-49	2.8152e-47
LILRB2	0.717614	2.27e-49	4.1541e-47
GP1BA	0.714996	7.28e-49	1.32496e-46
TIA1	0.711734	3.06e-48	5.5386e-46
PCDH17	0.709773	7.18e-48	1.2924e-45
SEMA7A	0.709664	7.53e-48	1.34787e-45
PRSS27	0.705761	4.03e-47	7.1734e-45
TNF	0.705586	4.34e-47	7.6818e-45
GHRL	0.705415	4.67e-47	8.2192e-45
F9	0.703747	9.46e-47	1.6555e-44
SIGLEC7	0.703495	1.05e-46	1.827e-44
VASN	0.703465	1.07e-46	1.8511e-44
CHRDL2	0.70126	2.69e-46	4.6268e-44
MPHOSPH8	0.701112	2.86e-46	4.8906e-44
ICAM5	0.700997	3e-46	5.1e-44
TIMD4	0.696326	2.07e-45	3.4983e-43
LGALS3	0.695816	2.55e-45	4.284e-43
COMP	0.694957	3.63e-45	6.0621e-43
C1QTNF1	0.693905	5.56e-45	9.2296e-43
CA3	0.689555	3.2e-44	5.28e-42
ANPEP	0.689456	3.33e-44	5.4612e-42
LDLR	0.688335	5.19e-44	8.4597e-42
AXL	0.687902	6.16e-44	9.9792e-42
SOST	0.685964	1.32e-43	2.1252e-41
VWF	0.685141	1.83e-43	2.928e-41
CDH6	0.682286	5.55e-43	8.8245e-41
CCL16	0.680713	1.02e-42	1.6116e-40
FBP1	0.680219	1.23e-42	1.9311e-40
LACTB2	0.678185	2.68e-42	4.1808e-40
KITLG	0.676611	4.87e-42	7.5485e-40
ZBTB17	0.673094	1.82e-41	2.8028e-39
ADAM15	0.671044	3.91e-41	5.9823e-39
TNFSF13B	0.67074	4.37e-41	6.6424e-39
VAMP5	0.669485	6.95e-41	1.04945e-38
CA4	0.668454	1.01e-40	1.515e-38
SIRPA	0.666753	1.89e-40	2.8161e-38
OSMR	0.666106	2.39e-40	3.5372e-38
ADAMTS16	0.665968	2.51e-40	3.6897e-38
NCAM1	0.664533	4.22e-40	6.1612e-38
TGFBI	0.663691	5.72e-40	8.294e-38
NPPB	0.6616	1.21e-39	1.7424e-37
CD2AP	0.658901	3.15e-39	4.5045e-37
ITGB2	0.654638	1.4e-38	1.988e-36
BMP6	0.653326	2.21e-38	3.1161e-36
ACP5	0.651486	4.17e-38	5.838e-36
ENTPD5	0.65076	5.35e-38	7.4365e-36
ITIH3	0.64857	1.13e-37	1.5594e-35
PLA2G1B	0.648414	1.19e-37	1.6303e-35
CNTN1	0.647349	1.71e-37	2.3256e-35
FABP6	0.645508	3.17e-37	4.2795e-35
TYRO3	0.644426	4.56e-37	6.1104e-35
MEGF9	0.644065	5.15e-37	6.8495e-35
CDH5	0.643265	6.72e-37	8.8704e-35
BAG6	0.64023	1.83e-36	2.3973e-34
DPP4	0.63691	5.44e-36	7.072e-34
AOC3	0.636813	5.61e-36	7.2369e-34
GLRX	0.6346	1.15e-35	1.472e-33
EGFR	0.634325	1.26e-35	1.6002e-33
AZU1	0.631893	2.74e-35	3.4524e-33
TNNI3	0.631204	3.41e-35	4.2625e-33
AGXT	0.631139	3.48e-35	4.3152e-33
AHCY	0.628058	9.23e-35	1.13529e-32
C2	0.626251	1.63e-34	1.9886e-32
ADA2	0.623082	4.36e-34	5.2756e-32
HYAL1	0.621635	6.81e-34	8.172e-32
FABP2	0.620504	9.64e-34	1.14716e-31
UMOD	0.620431	9.86e-34	1.16348e-31
MCAM	0.618693	1.68e-33	1.9656e-31
ENPP2	0.617956	2.1e-33	2.436e-31
PLTP	0.617559	2.36e-33	2.714e-31
IGFBP3	0.615623	4.24e-33	4.8336e-31
CBLIF	0.612278	1.15e-32	1.2995e-30
CRTAC1	0.610354	2.04e-32	2.2848e-30
HMOX1	0.608684	3.34e-32	3.7074e-30
STK11	0.608058	4.01e-32	4.411e-30
QPCT	0.607857	4.25e-32	4.6325e-30
ANG	0.601222	2.9e-31	3.132e-29
ADGRG2	0.601078	3.02e-31	3.2314e-29
APLP1	0.600396	3.67e-31	3.8902e-29
EDIL3	0.599102	5.31e-31	5.5755e-29
NTRK2	0.593181	2.8e-30	2.912e-28
ADAMTS13	0.590467	5.94e-30	6.1182e-28
ANXA4	0.588202	1.11e-29	1.1322e-27
SUSD1	0.587997	1.17e-29	1.1817e-27
EIF4EBP1	0.586991	1.54e-29	1.54e-27
COL4A1	0.586706	1.66e-29	1.6434e-27
GP2	0.584919	2.7e-29	2.646e-27
FCGR2A	0.58477	2.81e-29	2.7257e-27
GGH	0.583815	3.63e-29	3.4848e-27
ACY1	0.583073	4.43e-29	4.2085e-27
SOD1	0.582205	5.6e-29	5.264e-27
LEPR	0.581516	6.73e-29	6.2589e-27
PTN	0.58149	6.77e-29	6.2589e-27
THOP1	0.580695	8.38e-29	7.6258e-27
FCN2	0.575278	3.5e-28	3.15e-26
CTSH	0.574611	4.16e-28	3.7024e-26
ACAN	0.574603	4.17e-28	3.7024e-26
KYAT1	0.570609	1.17e-27	1.0179e-25
CA1	0.567348	2.7e-27	2.322e-25
TGM2	0.563973	6.35e-27	5.3975e-25
PROC	0.560543	1.5e-26	1.26e-24
RCOR1	0.556802	3.77e-26	3.1291e-24
PDGFRB	0.556206	4.36e-26	3.5752e-24
GDF2	0.555331	5.4e-26	4.374e-24
TIE1	0.551961	1.23e-25	9.84e-24
CA5A	0.551656	1.32e-25	1.0428e-23
GLO1	0.551498	1.37e-25	1.0686e-23
ADH4	0.549986	1.97e-25	1.5169e-23
LILRB1	0.548812	2.61e-25	1.9836e-23
VIM	0.548142	3.06e-25	2.295e-23
REN	0.546519	4.51e-25	3.3374e-23
NRCAM	0.546339	4.7e-25	3.431e-23
PLPBP	0.544832	6.71e-25	4.8312e-23
AK1	0.543663	8.84e-25	6.2764e-23
CEBPB	0.543223	9.8e-25	6.86e-23
MARCO	0.542908	1.06e-24	7.314e-23
CDH17	0.542791	1.08e-24	7.344e-23
SFTPD	0.54223	1.24e-24	8.308e-23
CPB1	0.540777	1.74e-24	1.1484e-22
GSTA1	0.538628	2.86e-24	1.859e-22
F7	0.538541	2.91e-24	1.8624e-22
CR2	0.536455	4.71e-24	2.9673e-22
CLUL1	0.53486	6.78e-24	4.2036e-22
CTSD	0.534047	8.16e-24	4.9776e-22
GUSB	0.533513	9.22e-24	5.532e-22
SLITRK6	0.530028	2.02e-23	1.1918e-21
QDPR	0.529857	2.1e-23	1.218e-21
GZMH	0.528169	3.07e-23	1.7499e-21
SERPINA11	0.526707	4.25e-23	2.38e-21
SELE	0.526477	4.47e-23	2.4585e-21
GH1	0.524074	7.6e-23	4.104e-21
MET	0.52111	1.45e-22	7.685e-21
AMY2A	0.518325	2.66e-22	1.3832e-20
THBS4	0.518273	2.69e-22	1.3832e-20
FUCA1	0.517293	3.32e-22	1.66e-20
HNRNPK	0.513438	7.58e-22	3.7142e-20
DPP7	0.511822	1.07e-21	5.136e-20
ANGPTL3	0.511293	1.19e-21	5.593e-20
FAP	0.510488	1.41e-21	6.486e-20
LILRB5	0.50914	1.88e-21	8.46e-20
FCGR3B	0.505523	3.99e-21	1.7556e-19
PDCD6	0.500242	1.18e-20	5.074e-19
CDHR5	0.498553	1.66e-20	6.972e-19
CES1	0.498204	1.78e-20	7.298e-19
PRCP	0.497579	2.02e-20	8.08e-19
AMY2B	0.495431	3.11e-20	1.2129e-18
GRK5	0.495186	3.27e-20	1.2426e-18
MEP1B	0.491703	6.54e-20	2.4198e-18
TFRC	0.489725	9.65e-20	3.474e-18
KIT	0.488311	1.27e-19	4.445e-18
SSC5D	0.484932	2.46e-19	8.364e-18
CHL1	0.481156	5.08e-19	1.6764e-17
MSTN	0.479938	6.41e-19	2.0512e-17
ICAM3	0.47575	1.41e-18	4.371e-17
NPTXR	0.46879	5.15e-18	1.545e-16
CPA1	0.461373	1.98e-17	5.742e-16
APOM	0.459067	2.98e-17	8.344e-16
PON2	0.453364	8.14e-17	2.1978e-15
CELA3A	0.452339	9.73e-17	2.5298e-15
ACOX1	0.445245	3.29e-16	8.225e-15
EPHX2	0.443521	4.41e-16	1.0584e-14
THPO	0.430607	3.73e-15	8.579e-14
HEBP1	0.424231	1.04e-14	2.288e-13
DUOX2	0.416514	3.47e-14	7.287e-13
FCRL1	0.414567	4.68e-14	9.36e-13
HK2	0.396205	7.21e-13	1.3699e-11
BPIFB1	0.39368	1.04e-12	1.872e-11
DDC	0.393519	1.06e-12	1.872e-11
CNDP1	0.378631	8.47e-12	1.3552e-10
SSC4D	0.378339	8.81e-12	1.3552e-10
CNPY2	0.368764	3.17e-11	4.438e-10
TCL1B	0.368593	3.24e-11	4.438e-10
MTPN	0.351004	3.05e-10	3.66e-09
CTF1	0.346819	5.1e-10	5.61e-09
CRX	0.328931	4.21e-09	4.21e-08
AKR1C4	0.328641	4.35e-09	4.21e-08
TSHB	0.321531	9.69e-09	7.752e-08
LEP	0.318763	1.32e-08	9.24e-08
DNAJB8	0.307638	4.37e-08	2.622e-07
SERPINB5	0.290409	2.55e-07	1.275e-06
TSPAN1	0.276532	9.71e-07	3.884e-06
CHIT1	0.273973	1.23e-06	3.884e-06
VSTM2L	0.262391	3.52e-06	7.04e-06
MFAP3	0.196388	0.000573955	0.000573955
