# Supplementary material for: Metabolomic analysis of honey bee ( Apis mellifera L.) response to glyphosate exposure
Source: Royal Society of Chemistry journal article supplement (doi:10.1039/d2mo00046f), 2022-05-03
Supplement: d2mo00046f6.pdf [file d2mo00046f6.pdf]

## Supporting Figures

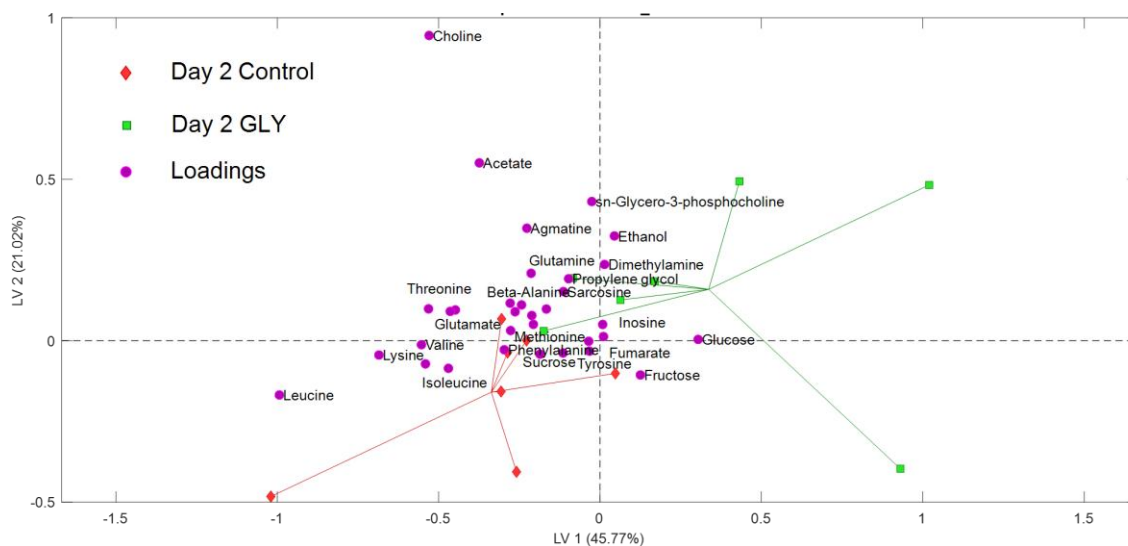

**Figure S1.** The PLS-DA score and loading combination plot for Day 2 study loading combination plot for Day 5 study between control and Glyphosate treatment bees. Matthew's Correlation Coefficient is 0.507 for cross validation confusion matrix, and the error rate is 0.25.

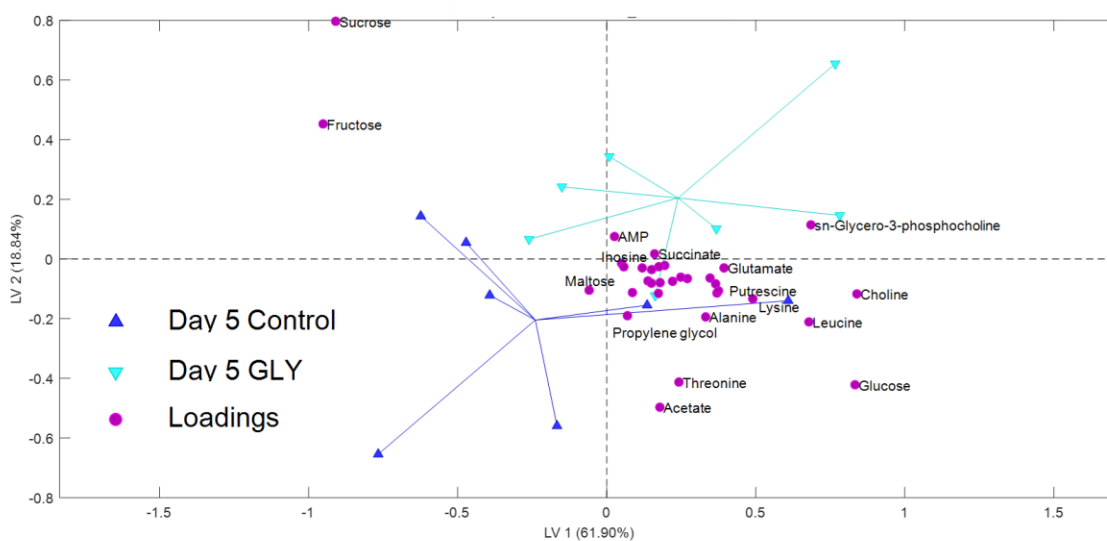

**Figure S2.** The PLS-DA score and loading combination plot for Day 5 study between control and Glyphosate treatment bees. Matthew's Correlation Coefficient = -0.192, and the error rate is 0.583.

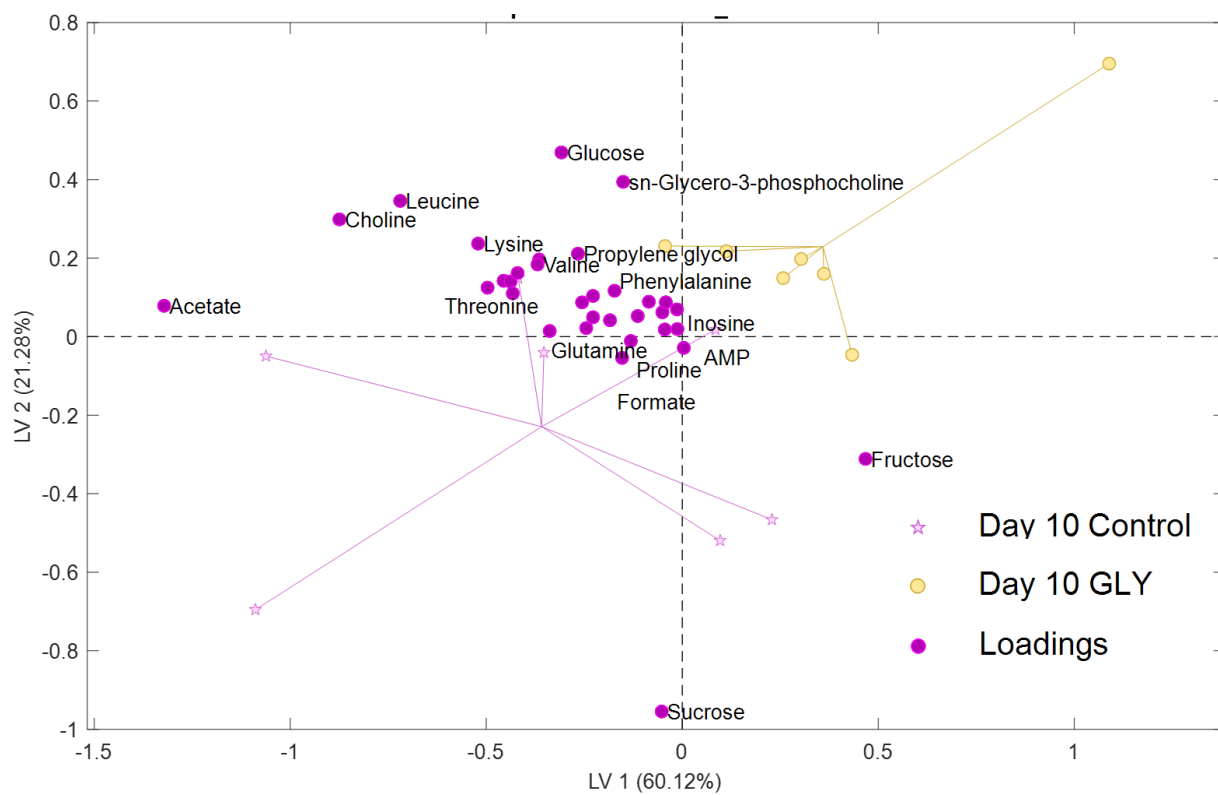

**Figure S3.** The PLS-DA score and loading combination plot for Day 5 study between control and Glyphosate treatment bees. Figure Matthew's Correlation Coefficient is 0.845 and the error rate is 0.08333.
